# Supplementary material
Source: PubMed Central journal article supplement (PMC7257641)
Supplement: NIHMS1030286-supplement-Supplemental_file.pdf [file NIHMS1030286-supplement-Supplemental_file.pdf]

## Supplementary Materials for

### **AIRE expression controls the peripheral selection of autoreactive B cells**

Joel Sng, Burcu Ayoglu, Jeff W. Chen, Jean-Nicolas Schickel, Elise M. N. Ferre, Salomé Glauzy, Neil Romberg, Manfred Hoenig, Charlotte Cunningham-Rundles, Paul J. Utz, Michail S. Lionakis, Eric Meffre\*

\*Corresponding author. Email: eric.meffre@yale.edu

Published 12 April 2019, *Sci. Immunol.* **4**, eaav6778 (2019)

DOI: 10.1126/sciimmunol.aav6778

#### **The PDF file includes:**

Fig. S1, related to Fig. 1. CD3D- and CD3E-deficient patients lack circulating CD3<sup>+</sup>CD4<sup>+</sup> T cells.

Fig. S2, related to Fig. 1. AIRE-deficient patients display elevated frequencies of CD19<sup>+</sup>CD27<sup>-</sup>CD10<sup>-</sup>CD21<sup>-/lo</sup> B cells.

Fig. S3, related to Fig. 1. Immunoglobulin heavy chain gene usage in new emigrant/transitional B cells from CD3- and AIRE-deficient patients and AIRE<sup>+/-</sup> heterozygous individuals.

Fig. S4, related to Fig. 1. Low frequencies of polyreactive new emigrant/transitional B cells in CD3- and AIRE-deficient patients and AIRE<sup>+/-</sup> heterozygous individuals.

Fig. S5, related to Fig. 2. Immunoglobulin heavy chain gene usage in mature naïve B cells from CD3- and AIRE-deficient patients and AIRE<sup>+/-</sup> heterozygous individuals.

Fig. S6, related to Fig. 2. Defective peripheral B cell tolerance checkpoint in CD3- and AIRE-deficient patients.

Fig. S7, related to Fig. 3. Serum cytokine concentrations in HDs, AIRE<sup>+/-</sup> carriers, and AIRE-deficient patients measured by Luminex.

Fig. S8, related to Fig. 4. Autoantigen array analysis of recombinant antibodies cloned from single-cell sorted new emigrant/transitional B cells from HDs, AIRE<sup>+/-</sup> heterozygous relatives, and AIRE-deficient patients.

Fig. S9, related to Fig. 4. Autoreactive clones identified in autoantigen array were previously identified as polyreactive and/or HEp-2 reactive by ELISAs.

Fig. S10, related to Fig. 5. TWEAK kinetic binding curves of antibodies from new emigrant/transitional and mature naïve B cells from CD3- and AIRE-deficient patients.

Fig. S11, related to Fig. 5. Increase frequencies of AIRE-independent antigen-reactive clones in the mature naïve B cell compartment of CD3- and AIRE-deficient patients.

Fig. S12, related to Fig. 6. Similar frequencies of T<sub>FH</sub> cells in HDs, AIRE<sup>+/-</sup> heterozygous individuals, and AIRE-deficient patients.

Fig. S13, related to Fig. 6. T<sub>regs</sub> from both AIRE heterozygotes and AIRE-deficient patients have normal in vitro suppressive function.

Fig. S14, related to Fig. 6. Elevated frequencies of CD3<sup>+</sup>CD4<sup>+</sup>CD45RO<sup>+</sup>CCR6<sup>+</sup>CXCR3<sup>-</sup> T cells in AIRE heterozygous individuals and AIRE-deficient patients.

Fig. S15, related to Fig. 6. T cells from AIRE-deficient patients and AIRE heterozygous individuals exhibit reduced IFN- $\gamma$  and T-bet expression during PMA-ionomycin activation.

Fig. S16, related to Fig. 6. T cells from AIRE-deficient patients exhibit reduced TNF- $\alpha$  expression during PMA-ionomycin activation.

Fig. S17, related to Fig. 6. T cells from AIRE-deficient patients exhibit reduced IL-2 expression during PMA-ionomycin activation.

Fig. S18, related to Fig. 7. Similar global TCRBV segment gene usage in T<sub>conv</sub> cells from HDs and AIRE-deficient patients.

Fig. S19, related to Fig. 7. TCR diversity of T<sub>reg</sub> and T<sub>conv</sub> cells from HDs and AIRE-deficient patients.

Fig. S20, related to Fig. 7. Reduced average CDR3 length in shared T<sub>reg</sub> TCR sequences of HDs and AIRE-deficient patients.

Fig. S21, related to Figs. 1 and 2. Example gating used for single B cell sort.

Fig. S22, related to Fig. 3A. Example gating used for B cell flow cytometry data.

Fig. S23, related to Fig. 6, A to C. Example gating used for T<sub>reg</sub> flow cytometry data.

Fig. S24, related to Fig. 6, D and E. Example gating used for T<sub>reg</sub> flow cytometry data.

Table S1. AIRE mutations and deletions detected in the American APECED patient cohort.

Table S3. List of AIRE-dependent and AIRE-independent PTAs detected in protein microarray that were bound by recombinant antibodies cloned from new emigrant/transitional and mature naïve cells from HDs, AIRE<sup>+/-</sup> heterozygous individuals, and AIRE- and CD3-deficient patients.

Table S4. Dissociation constants of recombinant antibodies cloned from new emigrant/transitional and mature naïve cells from HDs, AIRE<sup>+/-</sup> heterozygous individuals, and AIRE- and CD3-deficient patients.

Table S5. List of protein microarray antigens.

Materials and Methods

### **Other Supplementary Material for this manuscript includes the following:**

(available at [immunology.sciencemag.org/cgi/content/full/4/34/eaav6778/DC1](http://immunology.sciencemag.org/cgi/content/full/4/34/eaav6778/DC1))

Table S2 (Microsoft Excel format). Repertoire and reactivity of antibodies from new emigrant/transitional and mature naïve B cells from HD Y541, CD3- and AIRE-deficient patients, and AIRE<sup>+/-</sup> heterozygous individuals.

Data file S1 (Microsoft Excel format), related to Fig. 4 and Fig. S8. Autoantigen array profiling data.

## Supplementary Figures

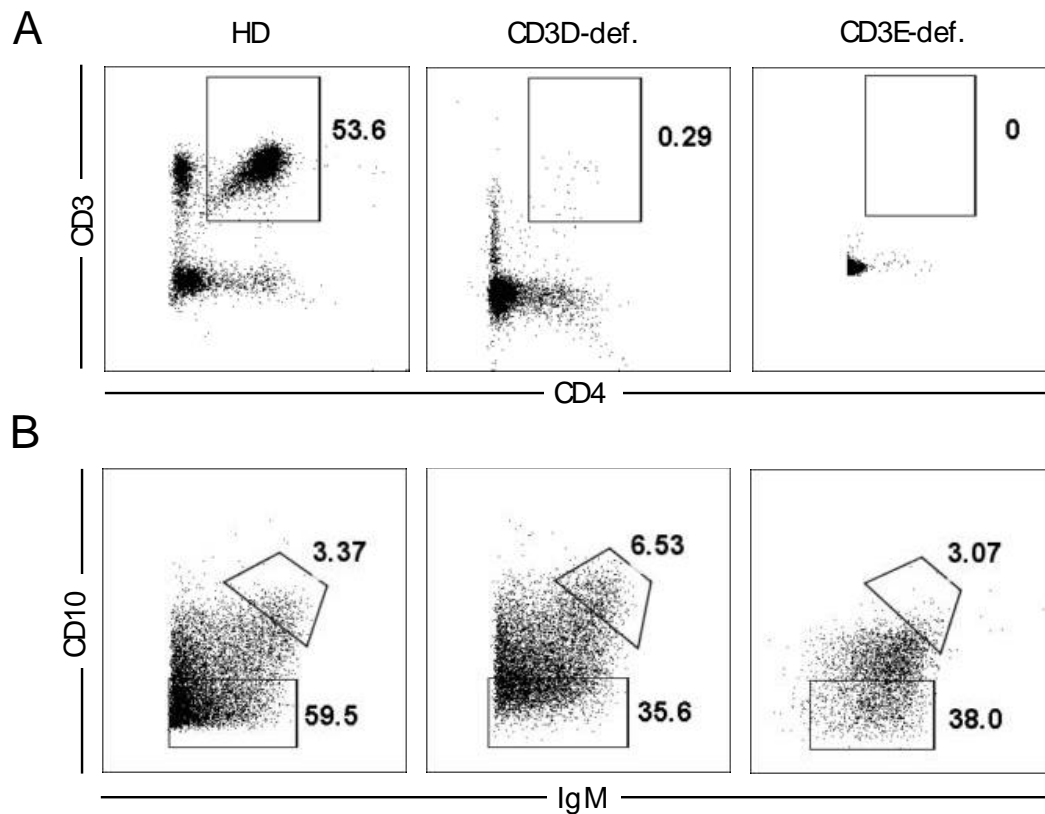

**Fig. S1, related to Fig. 1. CD3D- and CD3E-deficient patients lack circulating CD3<sup>+</sup>CD4<sup>+</sup> T cells.** (A) Representative CD3 and CD4 staining on total lymphocytes from a healthy donor (HD), a CD3D-deficient (CD3D-def.), and a CD3E-deficient (CD3E-def.) patient. (B) Representative CD10 and IgM staining on gated CD19<sup>+</sup>CD27<sup>-</sup> naïve B cells in a HD, a CD3D-def., and a CD3E-def. patient. Gating strategy for new emigrant/transitional (CD10<sup>hi</sup>IgM<sup>hi</sup>) and mature naïve (CD10<sup>lo</sup>IgM<sup>+</sup>) subsets are shown.

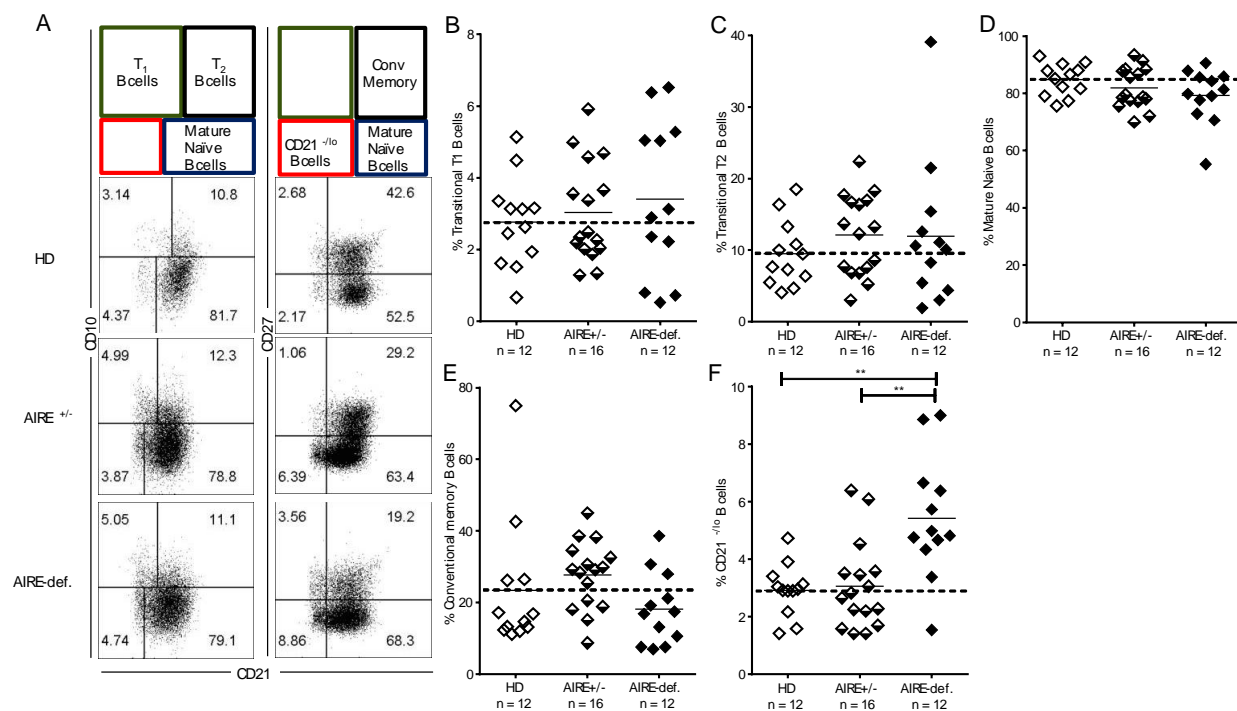

**Fig. S2, related to Fig. 1. AIRE-deficient patients display elevated frequencies of CD19<sup>+</sup>CD27<sup>-</sup>CD10<sup>high</sup>CD21<sup>-/lo</sup> B cells.** (A) Representative CD21 and CD10 staining (left) on CD19<sup>+</sup>CD27<sup>-</sup> B cells and CD21 and CD27 staining (right) on CD19<sup>+</sup> B cells from a healthy donor (HD), AIRE<sup>+/-</sup> subject and AIRE-deficient patient. Summarized frequencies of (B) CD19<sup>+</sup>CD27<sup>-</sup>CD10<sup>high</sup>CD21<sup>-/lo</sup> transitional T1, (C) CD19<sup>+</sup>CD27<sup>-</sup>CD10<sup>+</sup>CD21<sup>+</sup> transitional T2, (D) CD19<sup>+</sup>CD27<sup>-</sup>CD10<sup>-</sup>CD21<sup>+</sup> mature naïve, (E) CD19<sup>+</sup>CD27<sup>+</sup>CD10<sup>-</sup>CD21<sup>+</sup> conventional memory, and (F) CD19<sup>+</sup>CD27<sup>-</sup>CD10<sup>-</sup>CD21<sup>-/lo</sup> B cells are represented. Each symbol represents an individual, solid lines show the mean and dashed line indicates the averaged mean value for HDs. Statistically significant differences are indicated.

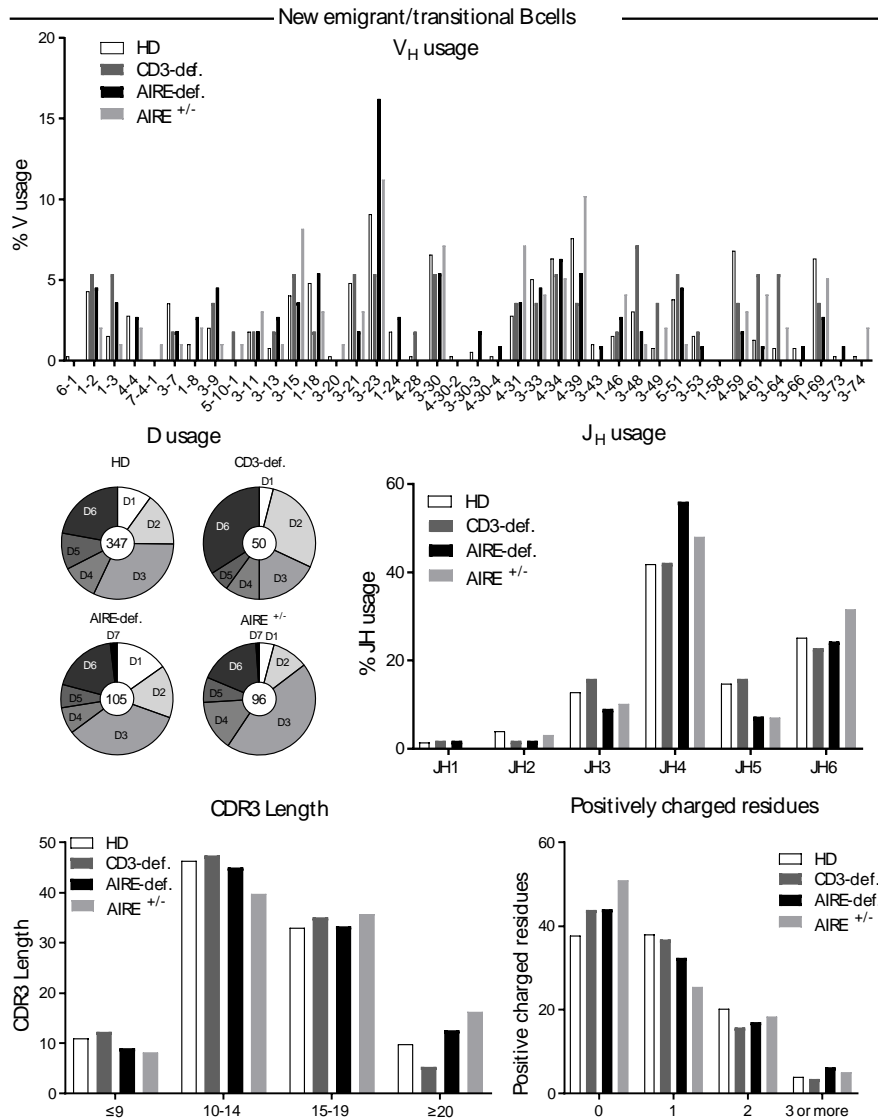

**Fig. S3, related to Fig. 1. Immunoglobulin heavy chain gene usage in new emigrant/transitional B cells from CD3- and AIRE-deficient patients and AIRE<sup>+/-</sup> heterozygous individuals. V<sub>H</sub>, D and J<sub>H</sub> gene segment usage, third complementarity-determining region (CDR3) length, and positively charged amino acid content are compared between new emigrant/transitional B cells from 13 healthy controls (HDs), two CD3-deficient (CD3-def.) patients, four AIRE-deficient (AIRE-def.) patients, and three AIRE heterozygous (AIRE<sup>+/-</sup>) subjects.**

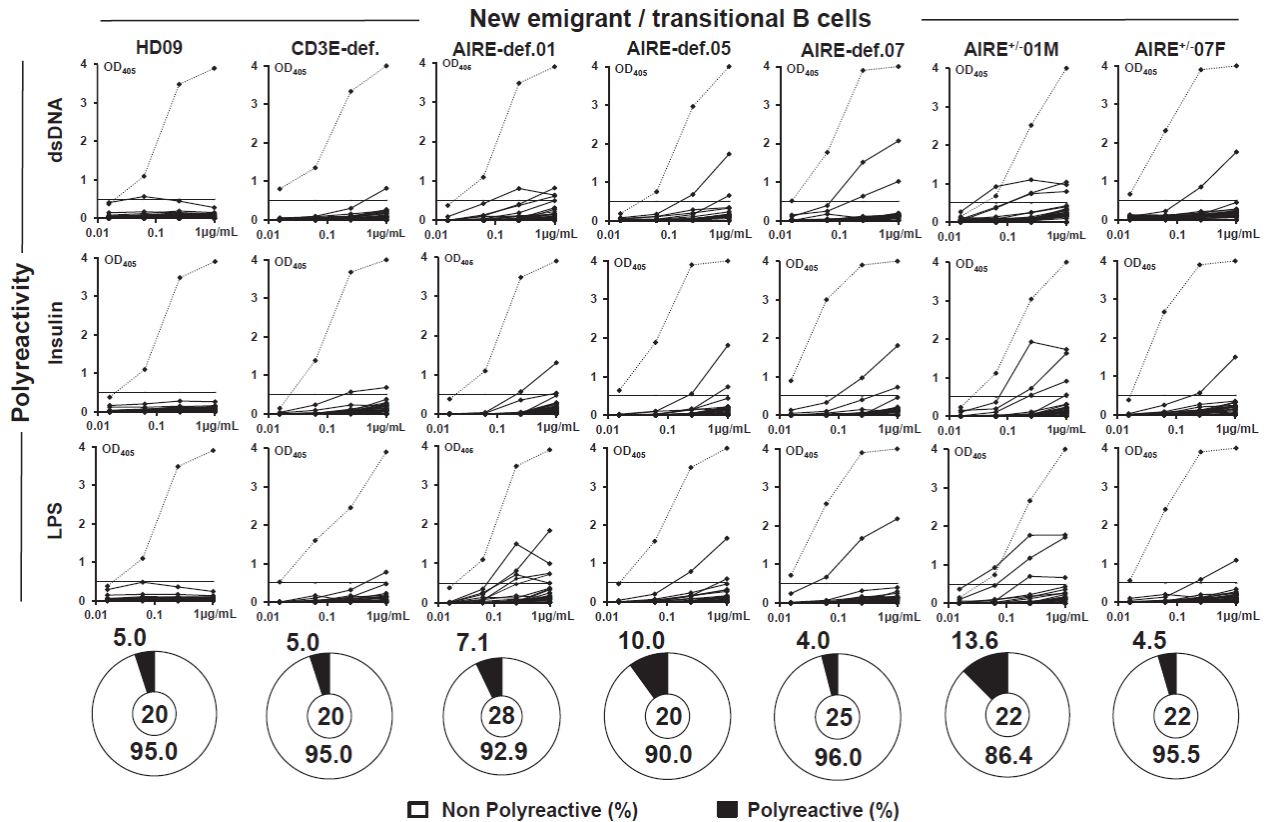

**Fig. S4, related to Fig. 1. Low frequencies of polyreactive new emigrant/transitional B cells in CD3- and AIRE-deficient patients and AIRE<sup>+/-</sup> heterozygous individuals.** Recombinant antibodies expressed by CD19<sup>+</sup>CD27<sup>+</sup>CD21<sup>-/lo</sup>CD10<sup>+</sup>IgM<sup>hi</sup> new emigrant/transitional B cells from a representative healthy donor (HD), a CD3E-deficient (CD3E-def.) patient, three AIRE-deficient patients (AIRE-def.) and two AIRE<sup>+/-</sup> heterozygous relatives (AIRE<sup>+/-</sup>) were tested by ELISA for polyreactivity against dsDNA, insulin, and LPS. Solid lines show binding for each cloned recombinant antibody. Dotted lines show ED38-positive control. Horizontal lines show cutoff OD<sub>405</sub> for positive reactivity. Antibodies were considered polyreactive when they recognized all three antigens. For each individual, the frequency of polyreactive B cells are summarized in pie charts, with the number of antibodies tested shown in the center. Please also see Figure 1.

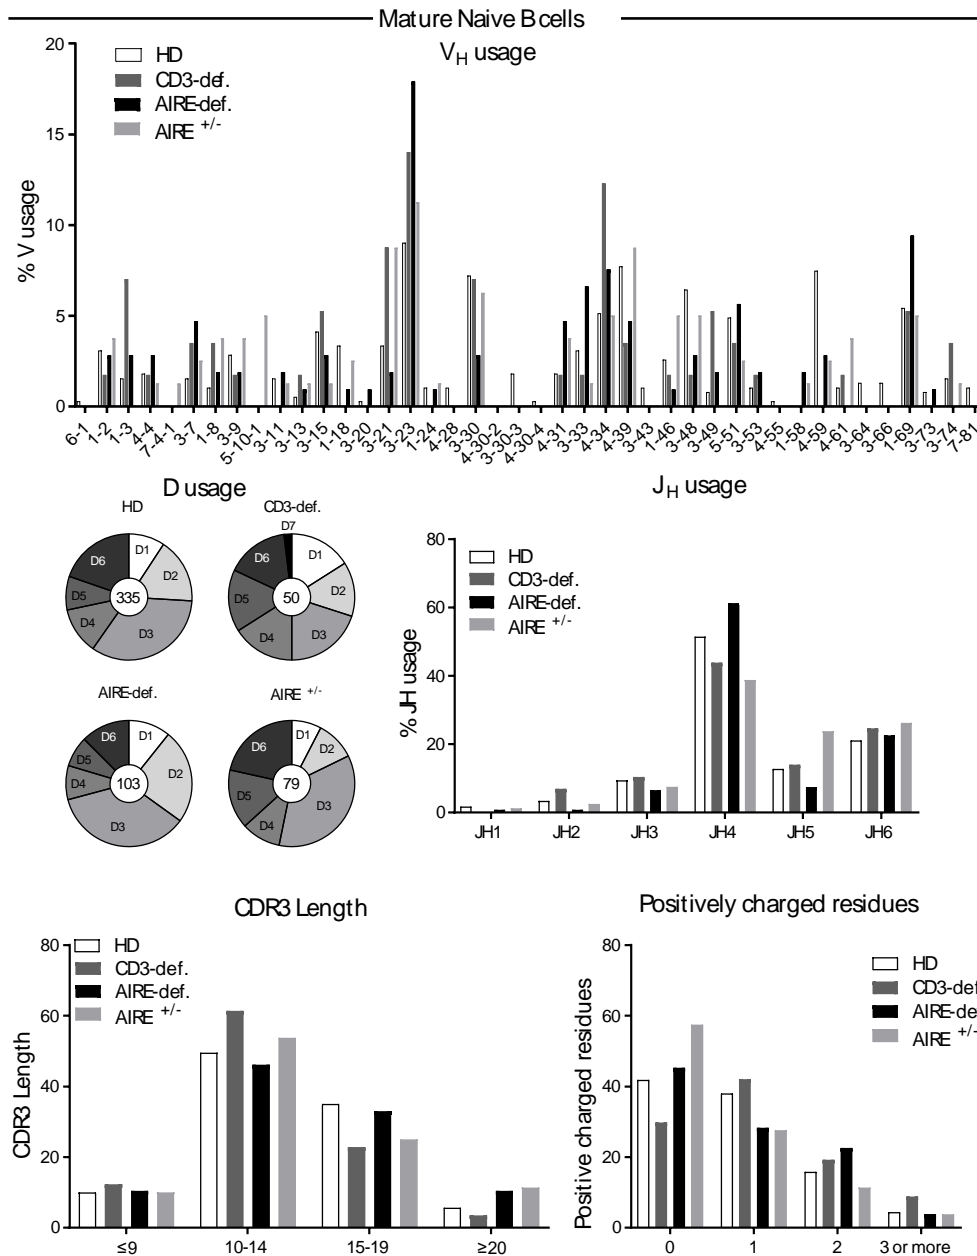

**Fig. S5, related to Fig. 2. Immunoglobulin heavy chain gene usage in mature naïve B cells from CD3- and AIRE-deficient patients and AIRE<sup>+/-</sup> heterozygous individuals. V<sub>H</sub>, D and J<sub>H</sub> gene segment usage, third complementarity-determining region (CDR3) length, and positively charged amino acid content are compared between mature naive B cells from 13 healthy controls (HDs), two CD3-deficient patients (CD3-def.), four AIRE-deficient patients (AIRE-def.) and three AIRE<sup>+/-</sup> heterozygous subjects (AIRE<sup>+/-</sup>).**

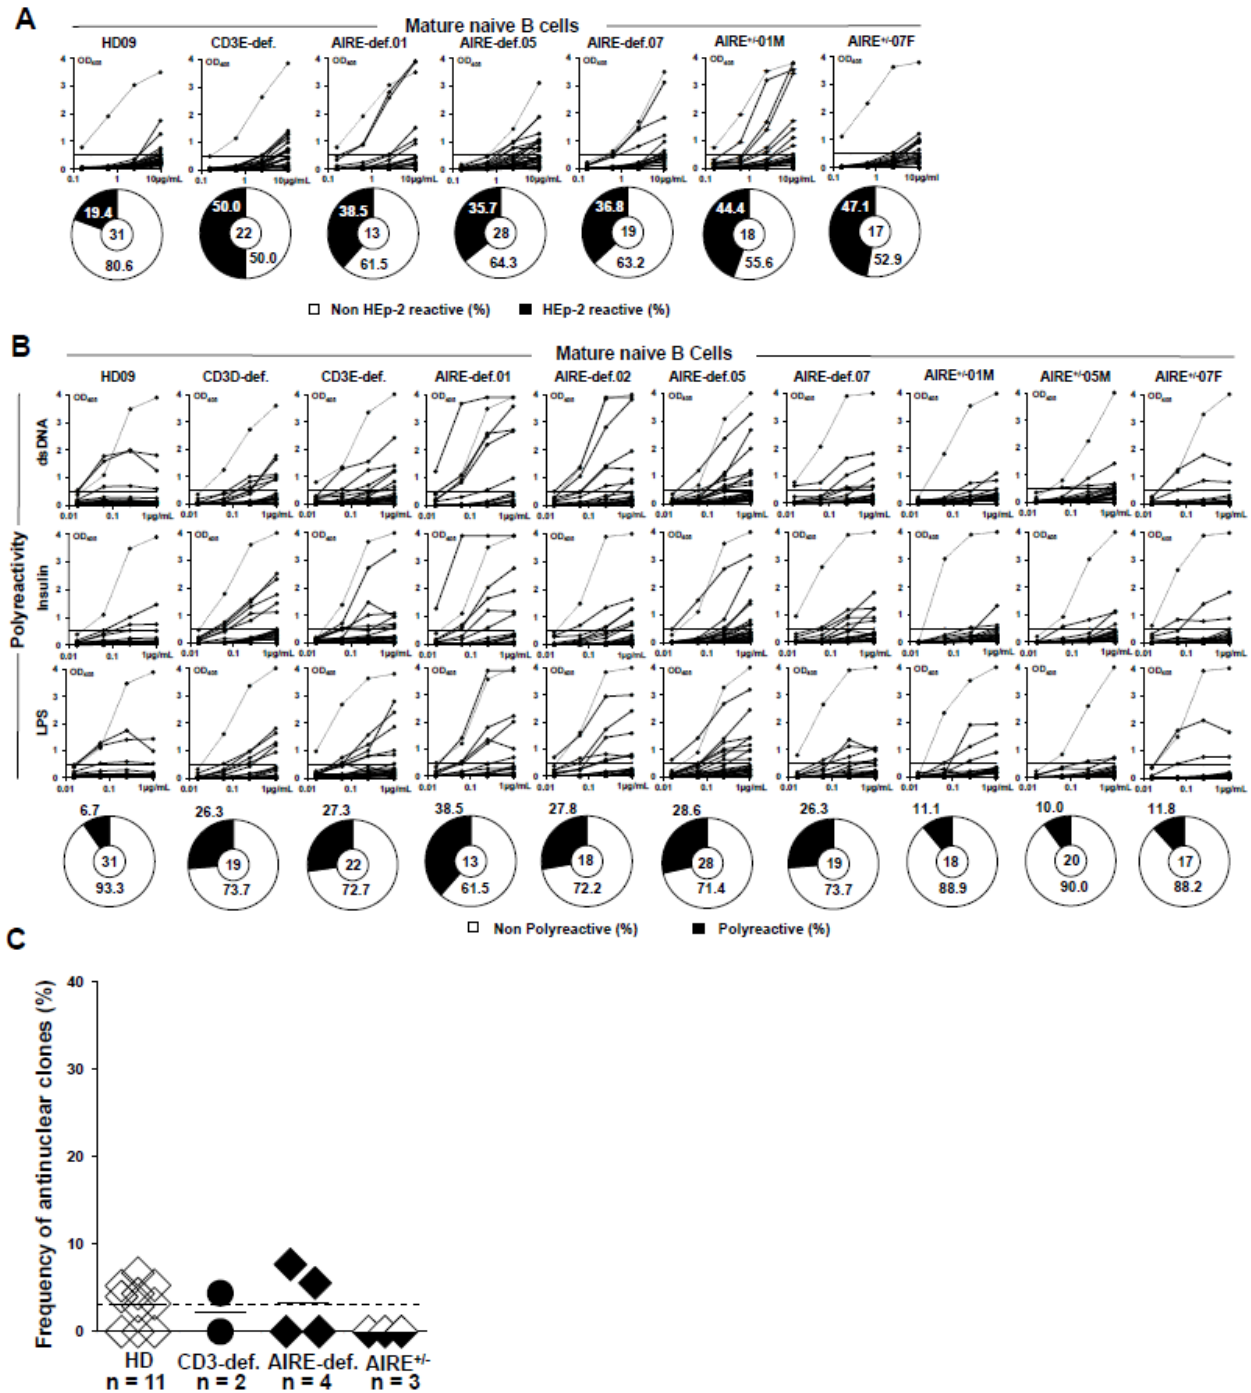

**Fig. S6, related to Fig. 2. Defective peripheral B cell tolerance checkpoint in CD3- and AIRE-deficient patients.** Recombinant antibodies expressed by CD19<sup>+</sup>CD21<sup>+</sup>CD10<sup>+</sup>IgM<sup>+</sup>CD27<sup>-</sup> mature naive B cells from a representative healthy donor (HD), a CD3E-deficient patient (CD3E-def.), three AIRE-deficient patients (AIRE-def.) and two AIRE heterozygous relatives (AIRE<sup>+/-</sup>)



were tested by ELISA for (A) HEp-2 reactivity, (B) polyreactivity against dsDNA, insulin, and LPS, and. Solid lines show binding for each cloned recombinant antibody. Dotted lines show ED38-positive control. Horizontal lines show cutoff  $OD_{405}$  for positive reactivity. For each individual, the frequency of HEp-2 B cells are summarized in pie charts, with the number of antibodies tested shown in the center. (C) Anti-nuclear mature naïve B cell frequencies from HDs, CD3-deficient patients, AIRE-deficient patients, and AIRE heterozygous subjects. Each symbol represents an individual, solid lines show the mean and dashed line indicates the averaged mean value for HDs. Please also see Figure 2.

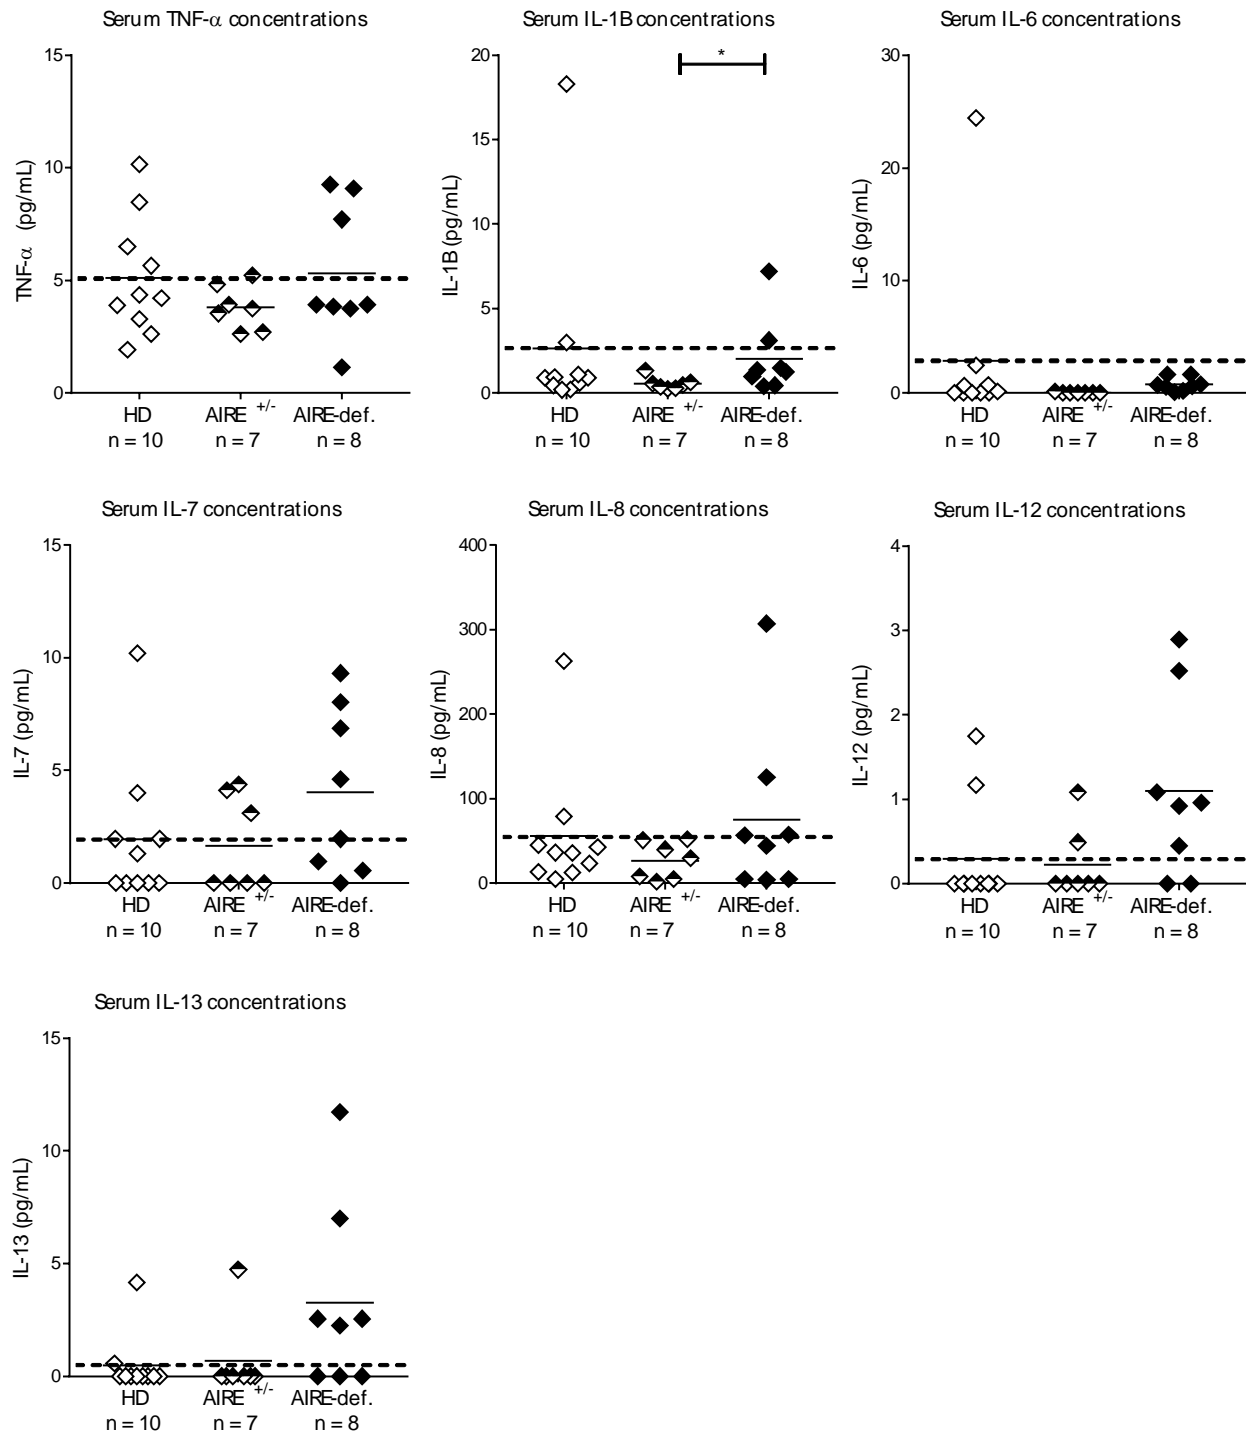

**Fig. S7, related to Fig. 3. Serum cytokine concentrations in HDs, AIRE<sup>+/-</sup> carriers, and AIRE-deficient patients measured by Luminex.** Each symbol represents an individual, solid lines show the mean and dashed line indicates the averaged mean value for HDs. Statistically significant differences are indicated.

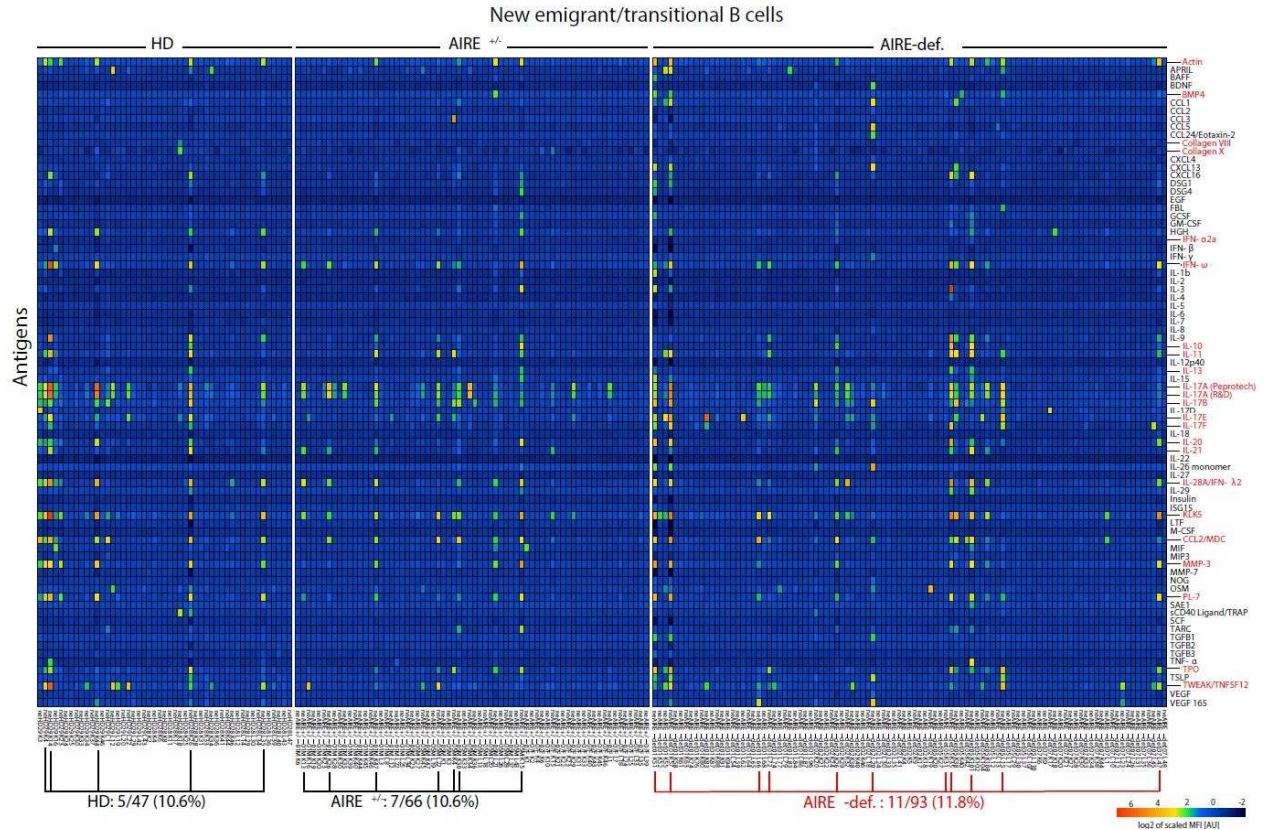

**Fig. S8, related to Fig. 4. Autoantigen array analysis of recombinant antibodies cloned from single-cell sorted new emigrant/transitional B cells from HDs, AIRE<sup>+/-</sup> heterozygous relatives, and AIRE-deficient patients.** Heatmap displaying reactivity of individual new emigrant/transitional B cells from healthy donors (HD, n=2), AIRE<sup>+/-</sup> heterozygous subjects (AIRE<sup>+/-</sup>, n=3) and AIRE-deficient patients (AIRE-def. n=4) against selected cytokines and other self-antigens. The frequencies of self-reactive new emigrant/transitional B cells are similar in HDs, AIRE<sup>+/-</sup> subjects, and AIRE-deficient patients.

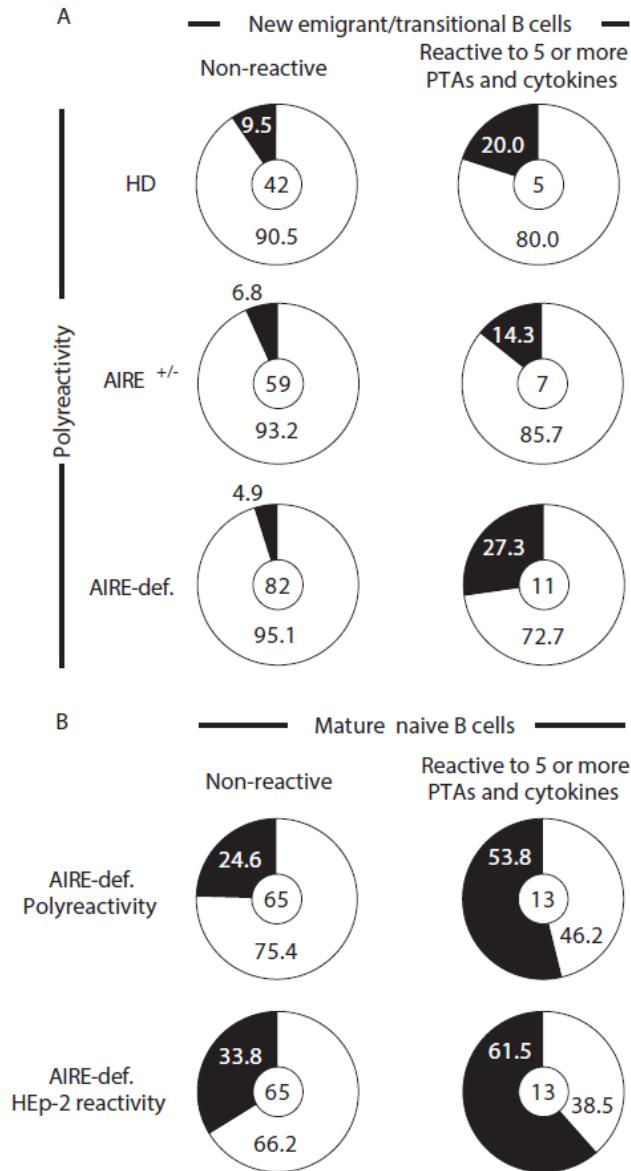

**Fig. S9, related to Fig. 4. Autoreactive clones identified in autoantigen array were previously identified as polyreactive and/or HEp-2 reactive by ELISAs.** Recombinant antibodies expressed by (A) new emigrant/transitional and (B) mature naive B cells from pooled healthy donors (HD, n=2), AIRE<sup>+/-</sup> heterozygous subjects (AIRE<sup>+/-</sup>, n=3) and AIRE-deficient patients (AIRE-def., n=4) that are non-reactive (left) or reactive (right) to five or more peripheral tissue antigens and cytokines are enriched in clones previously characterized as polyreactive and/or HEp-2 reactive by ELISA. Data are summarized in pie charts with the number of antibodies analyzed shown in the center.

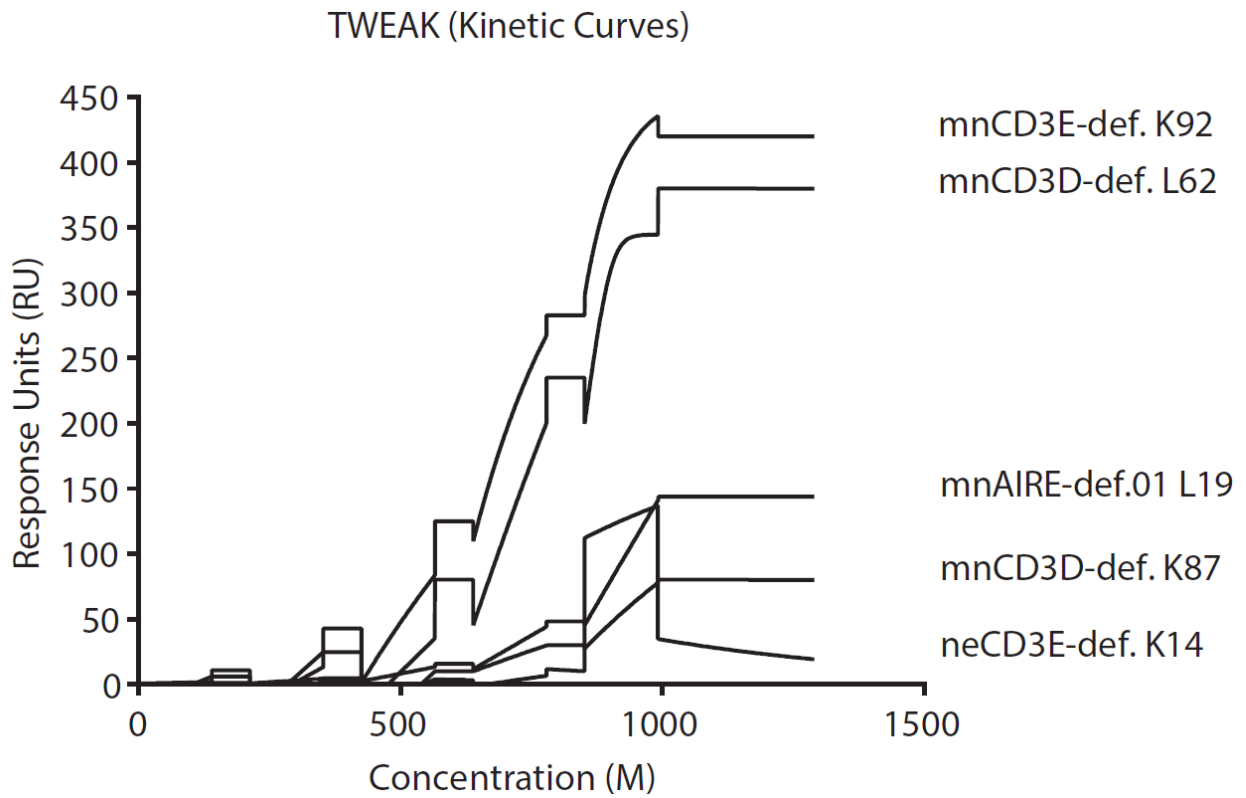

**Fig. S10, related to Fig. 5. TWEAK kinetic binding curves of antibodies from new emigrant/transitional and mature naïve B cells from CD3- and AIRE-deficient patients.** Surface plasmon resonance analysis of high affinity (10 $\mu$ M to < 1 nM range) antibody binding to the AIRE-independent antigen TWEAK.

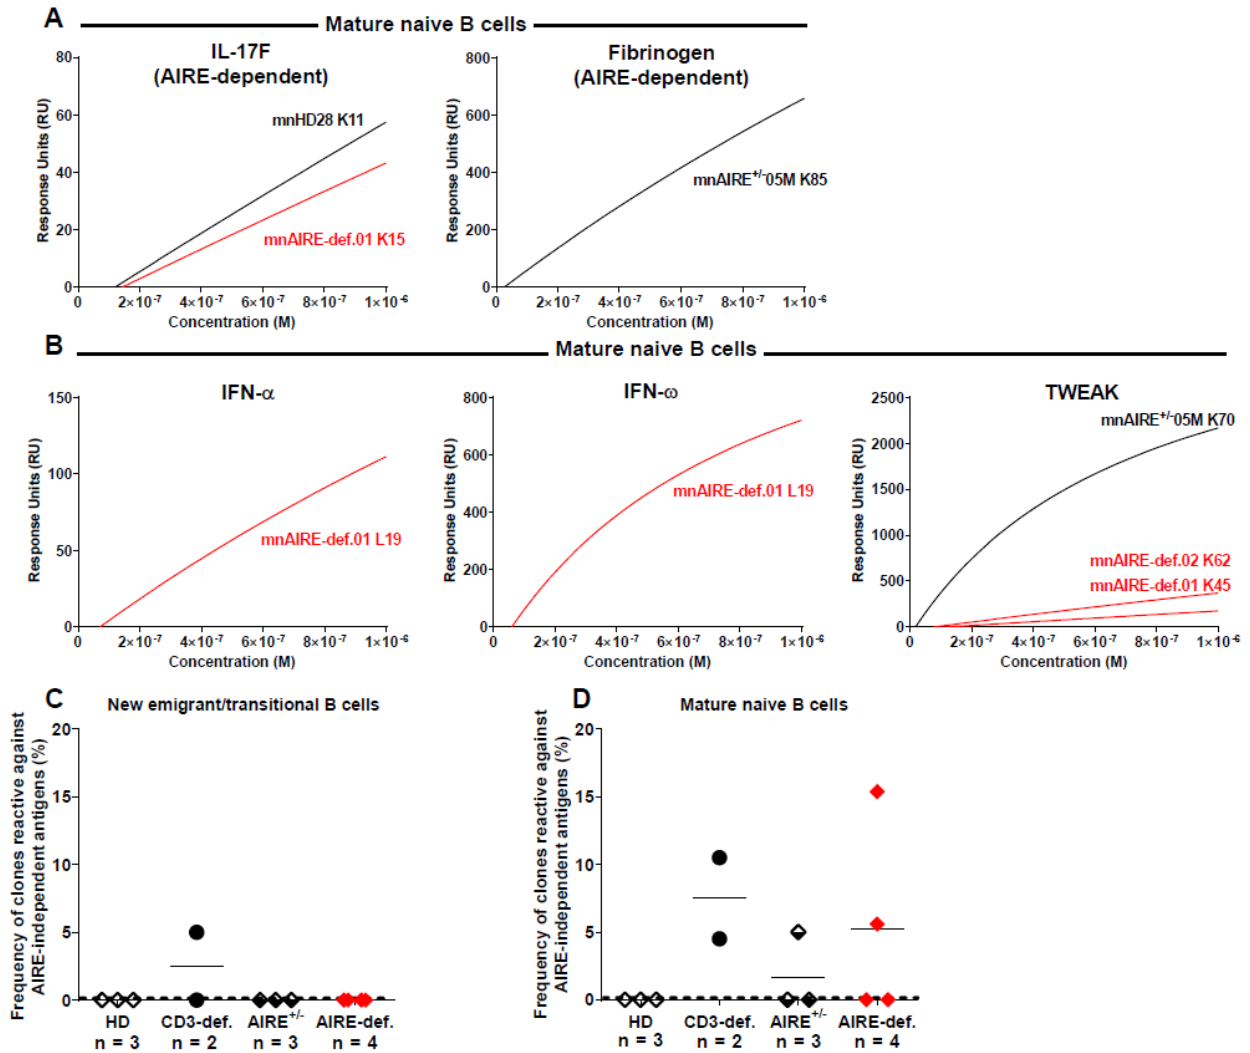

**Fig. S11, related to Fig. 5. Increase frequencies of AIRE-independent antigen-reactive clones in the mature naive B cell compartment of CD3- and AIRE-deficient patients.** Surface plasmon resonance analysis of antibody binding to the AIRE-dependent antigens, IL-17F and Fibrinogen (A) and AIRE-independent antigens, IFN- $\alpha$  and IFN- $\omega$  and TWEAK (B) by recombinant antibodies cloned from single mature naive B cells from three healthy donors (HDs), CD3-def. patients (CD3-def.), AIRE heterozygous (AIRE<sup>+/-</sup>) subjects, and AIRE-deficient (AIRE-def.) patients. Frequencies of (C) new emigrant/transitional and (D) mature naive B cells from HDs, CD3-def. patients, AIRE<sup>+/-</sup> subjects, and AIRE-def. patients reactive against AIRE-independent antigens.

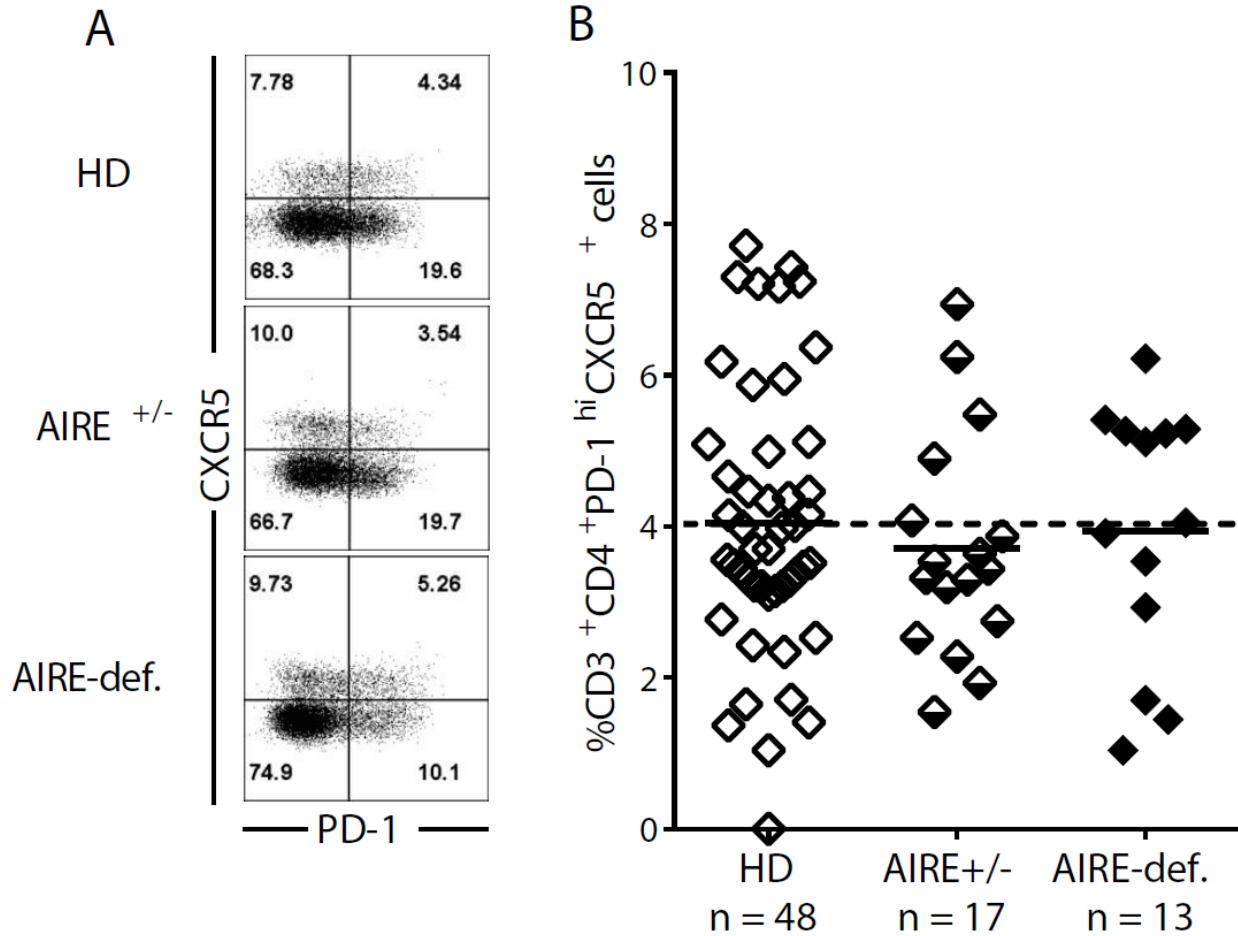

**Fig. S12, related to Fig. 6. Similar frequencies of T<sub>FH</sub> cells in HDs, AIRE<sup>+/-</sup> heterozygous individuals, and AIRE-deficient patients.** (A) Representative PD-1 and CXCR5 staining on CD3<sup>+</sup>CD4<sup>+</sup> cells from a healthy donor (HD), AIRE<sup>+/-</sup> heterozygous (AIRE<sup>+/-</sup>) subject, and AIRE-deficient (AIRE-def.) patient. (B) CD3<sup>+</sup>CD4<sup>+</sup>PD-1<sup>hi</sup>CXCR5<sup>+</sup> Tfh cell frequencies in HDs, AIRE<sup>+/-</sup> subjects, and AIRE-def. patients. Each symbol represents an individual, solid lines show the mean and dashed line indicates the averaged mean value for HDs.

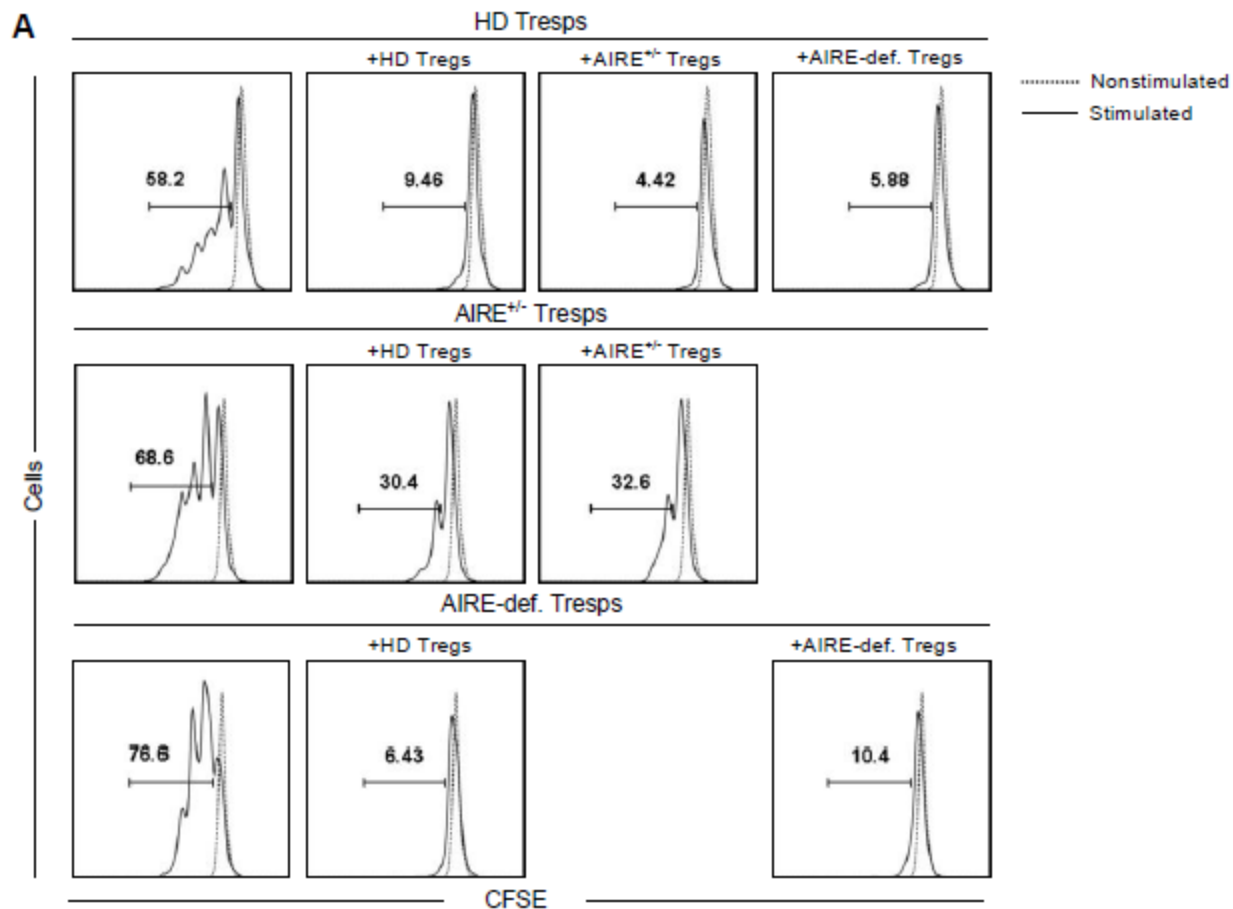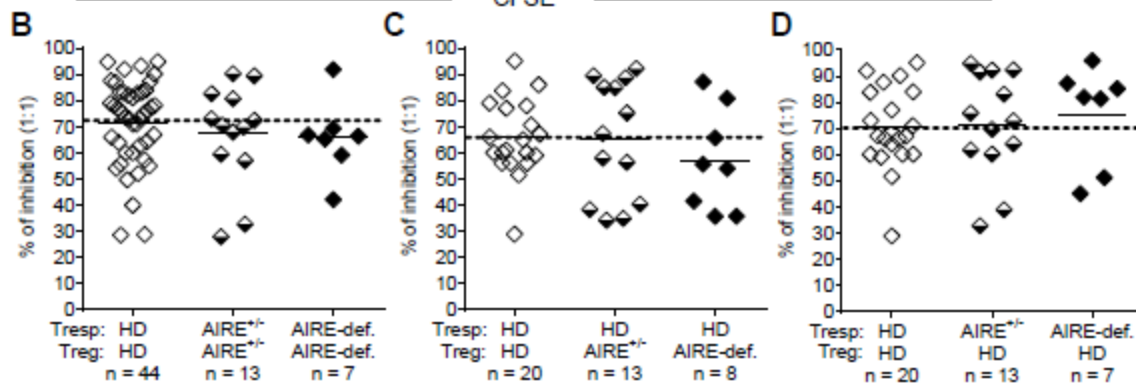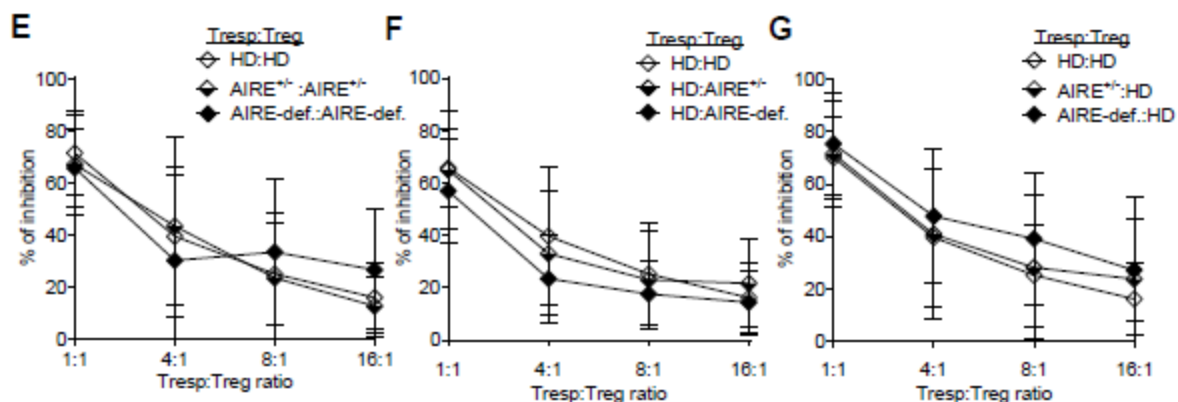



**Fig. S13, related to Fig. 6. T<sub>regs</sub> from both AIRE heterozygotes and AIRE-deficient patients have normal in vitro suppressive function.** (A) Representative histograms of Treg mediated suppression of autologous and heterologous CFSE-labeled T responders on day 3.5 from an AIRE<sup>+/-</sup> heterozygous subject (AIRE<sup>+/-</sup>) and an AIRE-deficient patient (AIRE-def.) compared with those from a healthy donor (HD). Dashed line shows non-stimulated T responders. (B) Autologous suppressive ability of Tregs from HDs, AIRE<sup>+/-</sup> subjects and AIRE-def. patients. (C) and (D) display the heterologous suppressive capacity of mixed Treg/Tresp co-cultures. Each symbol represents an individual, solid lines show the mean and dashed line indicates the averaged mean value for HDs. (E) Autologous and (F, G) heterologous suppressive ability of Tregs from healthy donors, AIRE<sup>+/-</sup> heterozygotes, and AIRE-deficient patients at lower Treg/Tresp ratios.

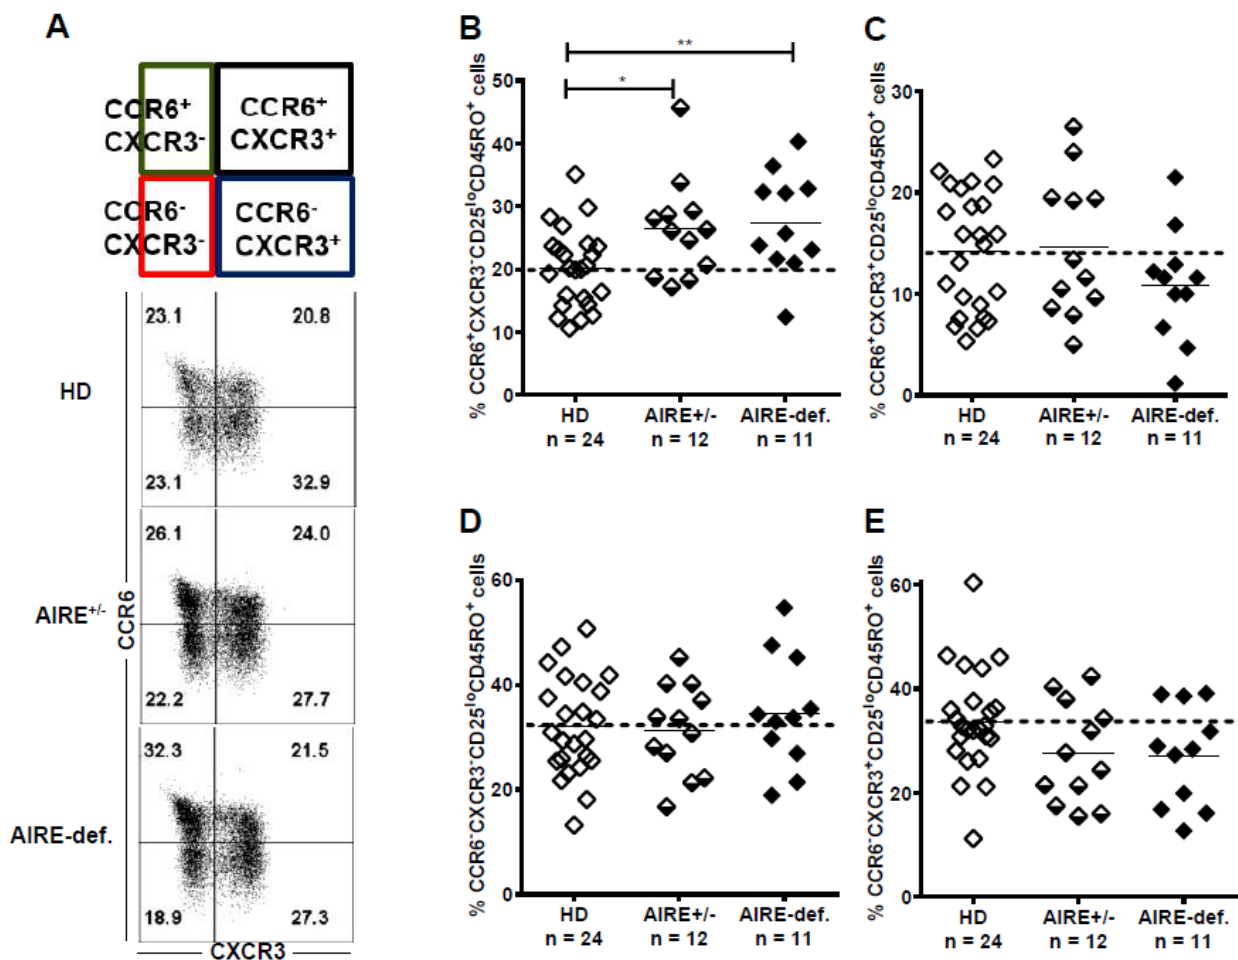

**Fig. S14, related to Fig. 6. Elevated frequencies of CD3<sup>+</sup>CD4<sup>+</sup>CD45RO<sup>+</sup>CCR6<sup>+</sup>CXCR3<sup>-</sup> T cells in AIRE heterozygous individuals and AIRE-deficient patients.** (A) Representative CXCR3 and CCR6 staining on CD3<sup>+</sup>CD4<sup>+</sup>CD8<sup>-</sup>CD25<sup>-</sup>CD45RO<sup>+</sup> T cells from a healthy donor (HD), an AIRE<sup>+/-</sup> heterozygous subject (AIRE<sup>+/-</sup>) and an AIRE-deficient patient (AIRE-def.). Summarized frequencies of (B) CCR6<sup>+</sup>CXCR3<sup>-</sup>, (C) CCR6<sup>+</sup>CXCR3<sup>+</sup>, (D) CCR6<sup>-</sup>CXCR3<sup>-</sup>, and (E) CCR6<sup>-</sup>CXCR3<sup>+</sup> T cells from each subject's group is shown. Each symbol represents an individual, solid lines show the mean and dashed line indicates the averaged mean value for HDs. Statistically significant differences are indicated.

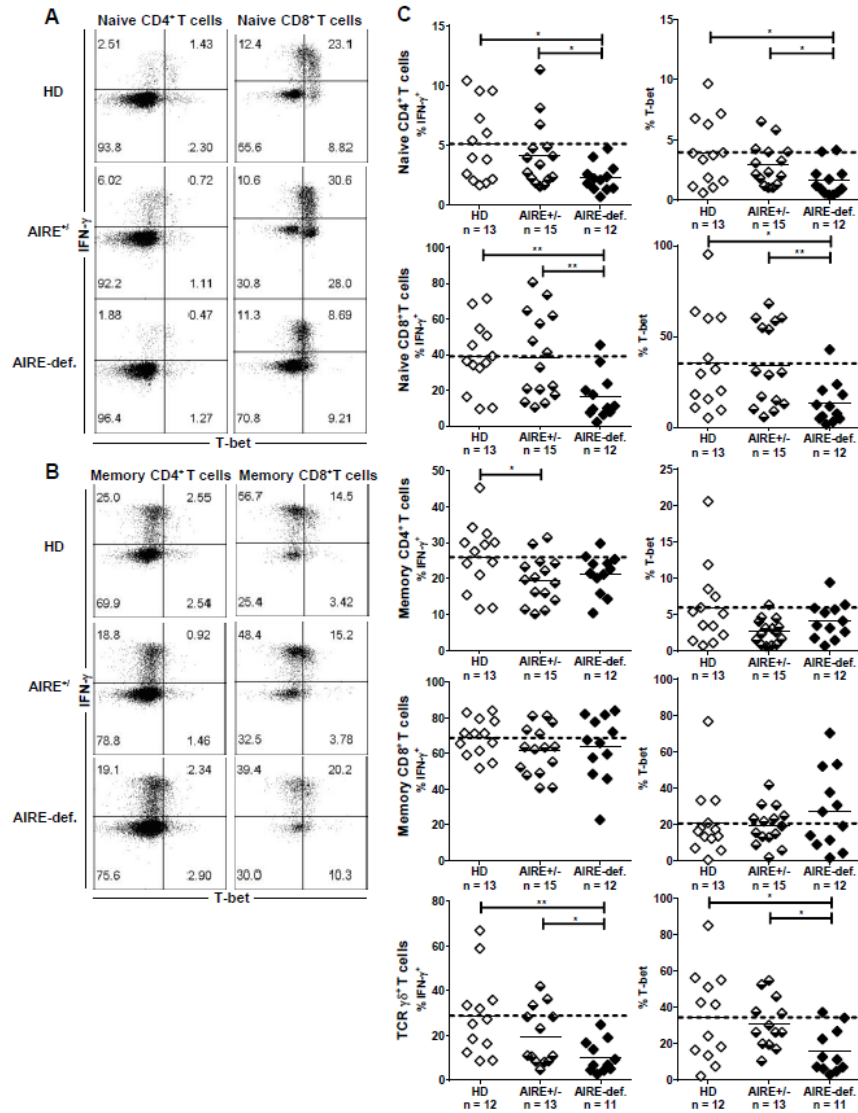

**Fig. S15, related to Fig. 6. T cells from AIRE-deficient patients and AIRE heterozygous individuals exhibit reduced IFN- $\gamma$  and Tbet expression during PMA-ionomycin activation.**

(A) Representative Tbet and IFN- $\gamma$  staining on naïve CD4<sup>+</sup> (left) and naïve CD8<sup>+</sup> (right) T cells from a healthy donor (HD), an AIRE<sup>+/-</sup> heterozygous subject (AIRE<sup>+/-</sup>) and an AIRE-deficient patient (AIRE-def.). (B) Representative Tbet and IFN- $\gamma$  staining on memory CD4<sup>+</sup> (left) and memory CD8<sup>+</sup> (right) T cells from a HD, an AIRE<sup>+/-</sup> subject, and an AIRE-deficient patient. (C) Frequencies of IFN- $\gamma$ <sup>+</sup> (left) and Tbet<sup>+</sup> (right) T cells in HDs, AIRE<sup>+/-</sup> subjects, and AIRE-deficient patients. Each symbol represents an individual, solid lines show the mean and dashed

line indicates the averaged mean value for HDs. Statistically significant differences are indicated.

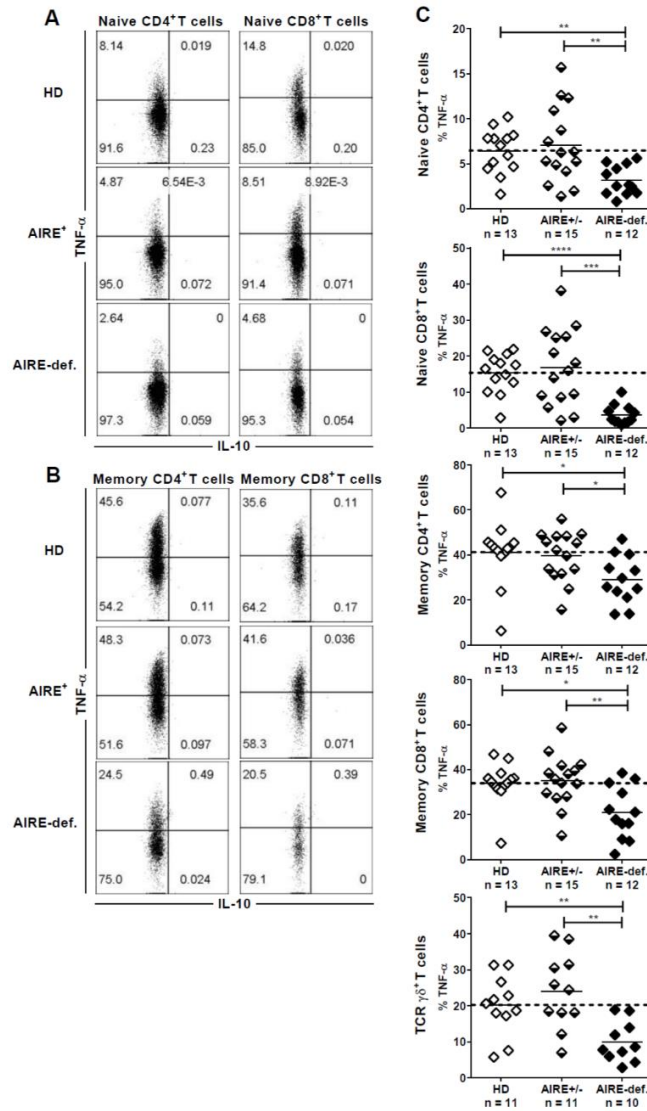

**Fig. S16, related to Fig. 6. T cells from AIRE-deficient patients exhibit reduced TNF- $\alpha$  expression during PMA-ionomycin activation. (A) Representative IL-10 and TNF- $\alpha$  staining on naïve CD4<sup>+</sup> (left) and naïve CD8<sup>+</sup> (right) T cells from a healthy donor (HD), an AIRE<sup>+/-</sup> heterozygous subject (AIRE<sup>+/-</sup>) and an AIRE-deficient patient (AIRE-def.). (B) Representative IL-10 and TNF- $\alpha$  staining on memory CD4<sup>+</sup> (left) and memory CD8<sup>+</sup> (right) T cells from a HD, an AIRE<sup>+/-</sup> subject, and an AIRE-deficient patient. (C) Frequencies of TNF- $\alpha$ <sup>+</sup> T cells in HDs, AIRE<sup>+/-</sup> subjects, and AIRE-deficient patients. Each symbol represents an individual, solid lines show**

the mean and dashed line indicates the averaged mean value for HDs. Statistically significant differences are indicated.

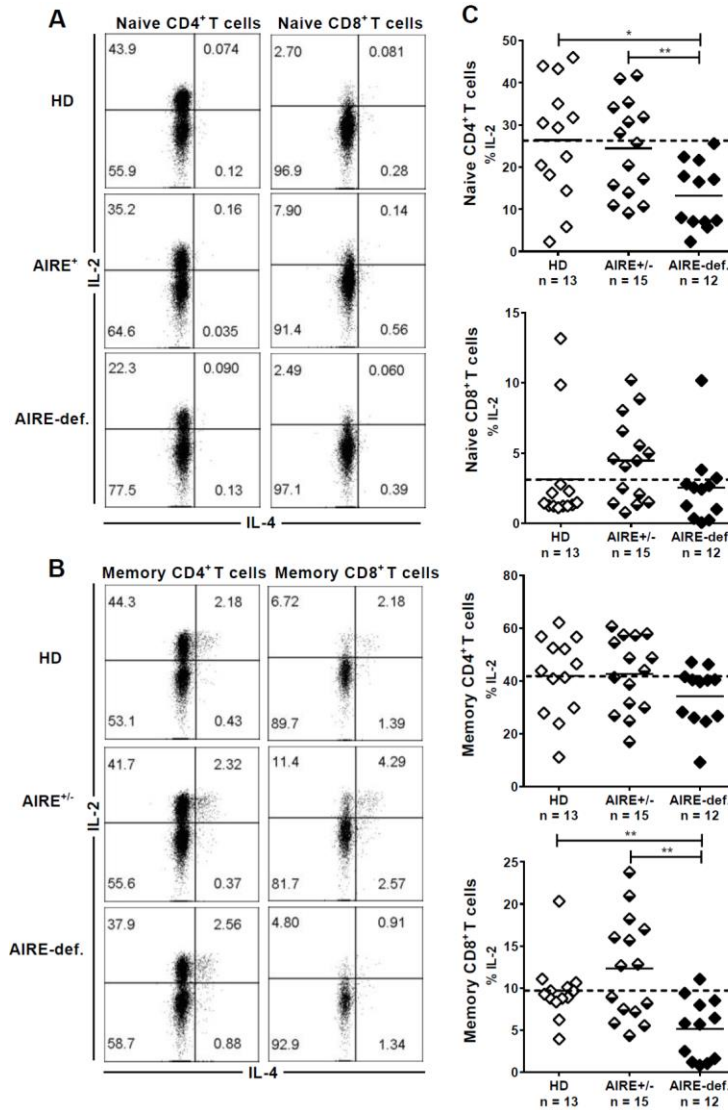

**Fig. S17, related to Fig. 6. T cells from AIRE-deficient patients exhibit reduced IL-2 expression during PMA-ionomycin activation.** (A) Representative IL-4 and IL-2 staining on naïve CD4<sup>+</sup> (left) and naïve CD8<sup>+</sup> (right) T cells from a healthy donor (HD), an AIRE<sup>+/-</sup> heterozygous subject (AIRE<sup>+/-</sup>) and an AIRE-deficient patient (AIRE-def.). (B) Representative IL-4 and IL-2 staining on memory CD4<sup>+</sup> (left) and memory CD8<sup>+</sup> (right) T cells from a HD, an AIRE<sup>+/-</sup> subject, and an AIRE-deficient patient. (C) Frequencies of IL-2<sup>+</sup> T cells in HDs, AIRE<sup>+/-</sup> subjects, and AIRE-deficient patients. Each symbol represents an individual, solid lines show

the mean and dashed line indicates the averaged mean value for HDs. Statistically significant differences are indicated.

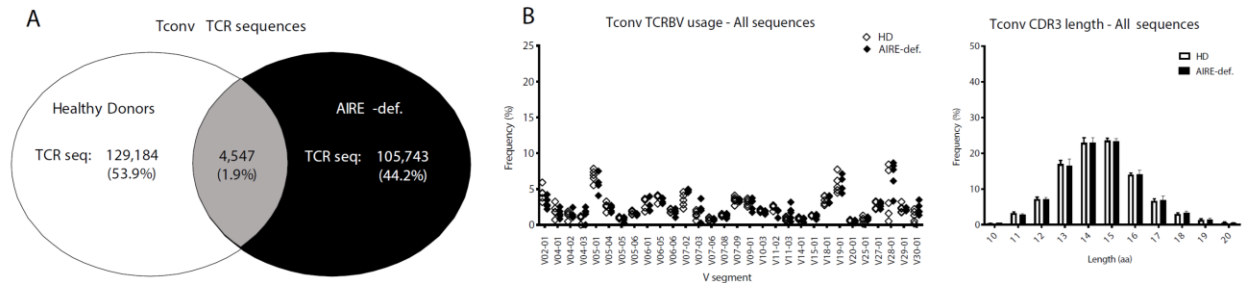

**Fig. S18, related to Fig. 7. Similar global TCRBV segment gene usage in  $T_{conv}$  cells from HDs and AIRE-deficient patients.**  $CD4^+CD127^+$   $T_{conv}$  cells were sorted by flow cytometry from healthy donor controls (HD,  $n=5$ ) and AIRE-deficient patients (AIRE-def.,  $n=5$ ) and subjected to T cell receptor beta variable (TCRBV) sequencing. (A) Summary chart of  $T_{conv}$  CDR3 TCR sequences obtained from HD controls and AIRE-deficient patients. (B) TCRBV V gene segment usage and CDR3 length in  $T_{conv}$  from HDs and AIRE-deficient patients.

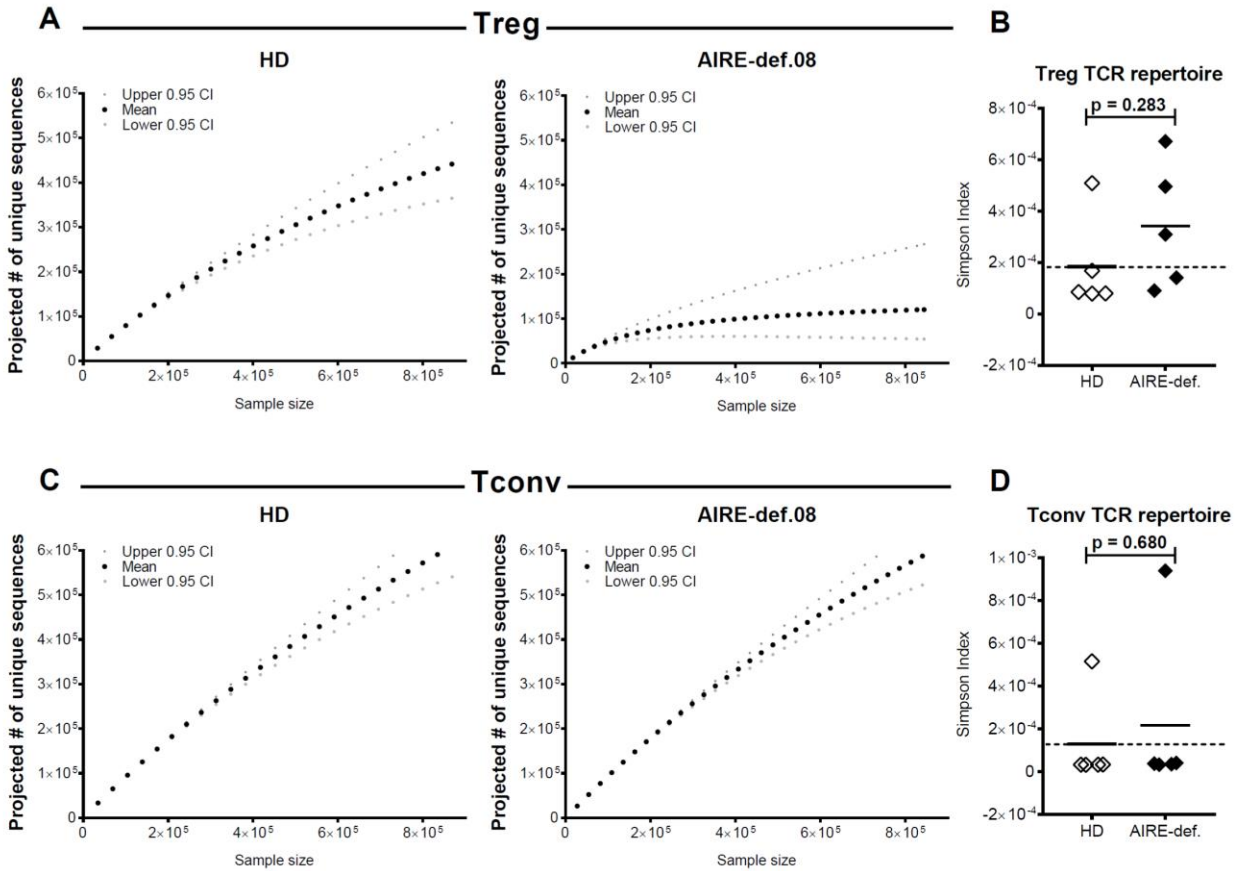

**Fig. S19, related to Fig. 7. TCR diversity of  $T_{reg}$  and  $T_{conv}$  cells from HDs and AIRE-deficient patients.** (A) Rarefaction analysis of the projected number of unique Treg TCR sequences in a representative healthy donor (HD) and an AIRE-deficient (AIRE-def.) patient. (B) Simpson Index analysis of Treg TCR diversity of 5 HDs and 5 AIRE-deficient patients. (C) Rarefaction analysis of the projected number of unique Tconv TCR sequences in a representative healthy donor (HD) and an AIRE-deficient patient. (D) Simpson Index analysis of Tconv TCR diversity of 5 HDs and 5 AIRE-deficient patients.

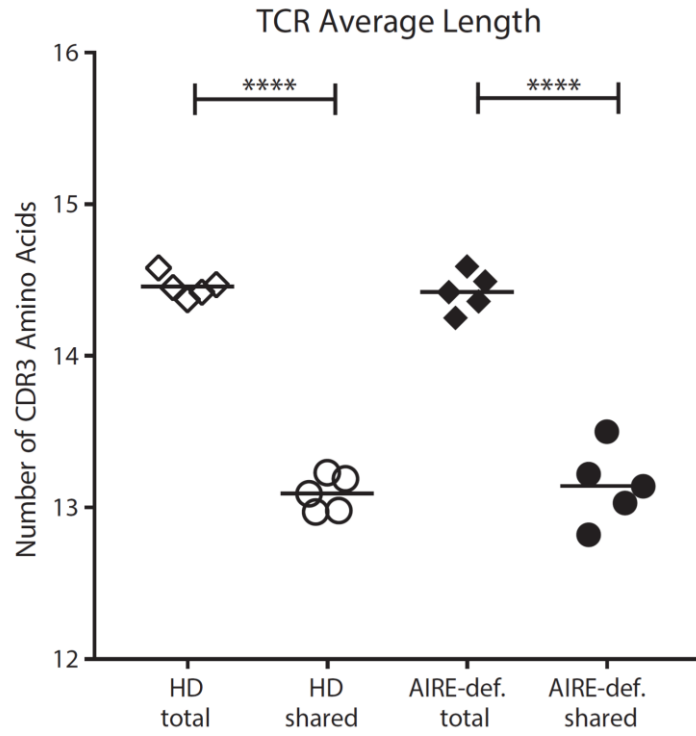

**Fig. S20, related to Fig. 7. Reduced average CDR3 length in shared T<sub>reg</sub> TCR sequences of HDs and AIRE-deficient patients.**



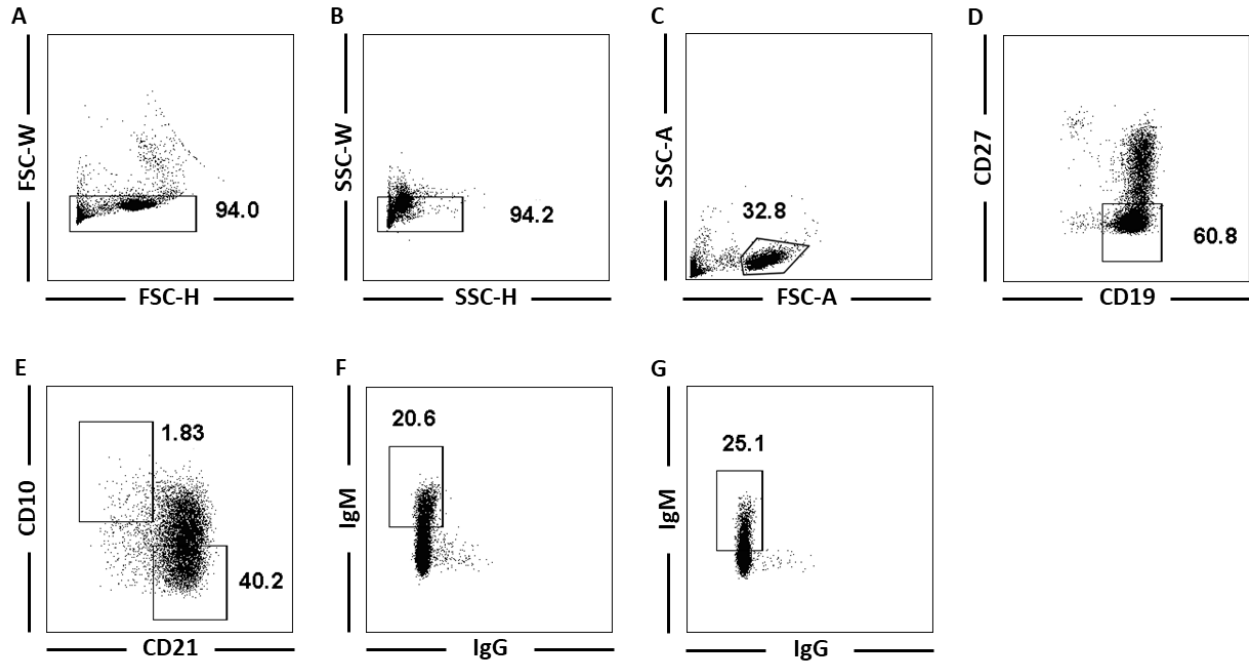

**Fig. S21, related to Figs. 1 and 2. Example gating used for single B cell sort.** The data corresponds with FACS sorted single  $CD19^+CD27^-CD10^+IgM^{hi}CD21^{lo}$  new emigrant/transitional B cells and  $CD19^+CD27^-CD10^-IgM^+CD21^+$  mature naïve B cells described in Fig 1 and 2. From left to right, doublet exclusion is invoked gating first on (A) FSC-H and FSC-W, followed by (B) SSC-H and SSC-W. Next, live lymphocytes are gated by (C) FSC-A and SSC-A, followed by gating on the naïve B cell subset (D)  $CD19^+$  and  $CD27^-$ , followed by gating on (E) the  $CD10^+CD21^{lo}$  (top left) and  $CD10^-CD21^+$  (bottom right) subsets. The  $CD10^+CD21^{lo}$  subset is subsequently gated on (F) the  $IgM^{hi}$  population to identify emigrant/transitional B cells, while the  $CD10^-CD21^+$  subset is gated on (G) the  $IgM^+$  population to identify mature naïve B cells.

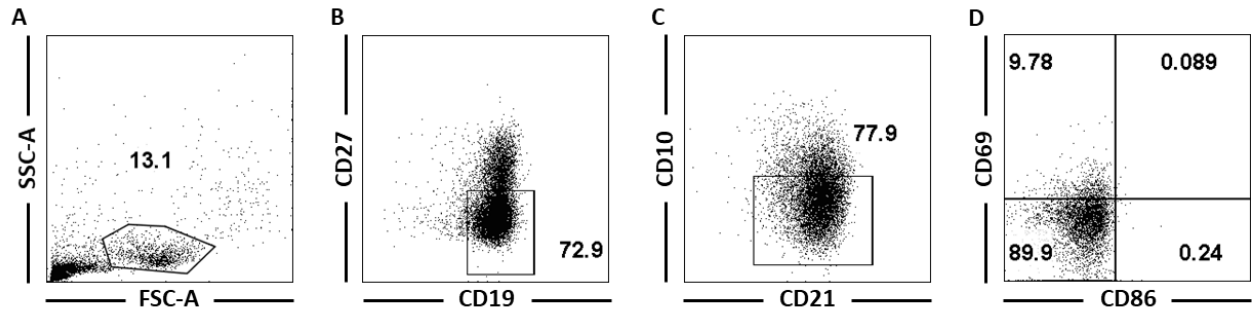

**Fig. S22, related to Fig. 3A. Example gating used for B cell flow cytometry data.** The data corresponds with CD19<sup>+</sup>CD27<sup>-</sup>CD21<sup>+</sup>CD10<sup>-</sup> mature naïve B cells shown in Fig. 3A. From left to right, gating first on (A) FSC-A and SSC-A, followed by gating on the naïve B cell subset (B) CD19<sup>+</sup> and CD27<sup>-</sup>, followed by gating on the mature naïve B cell subset (C) CD21<sup>+</sup> and CD10<sup>-</sup>. (D) CD86 and CD69 expression markers are thus displayed as seen in Fig. 3A.

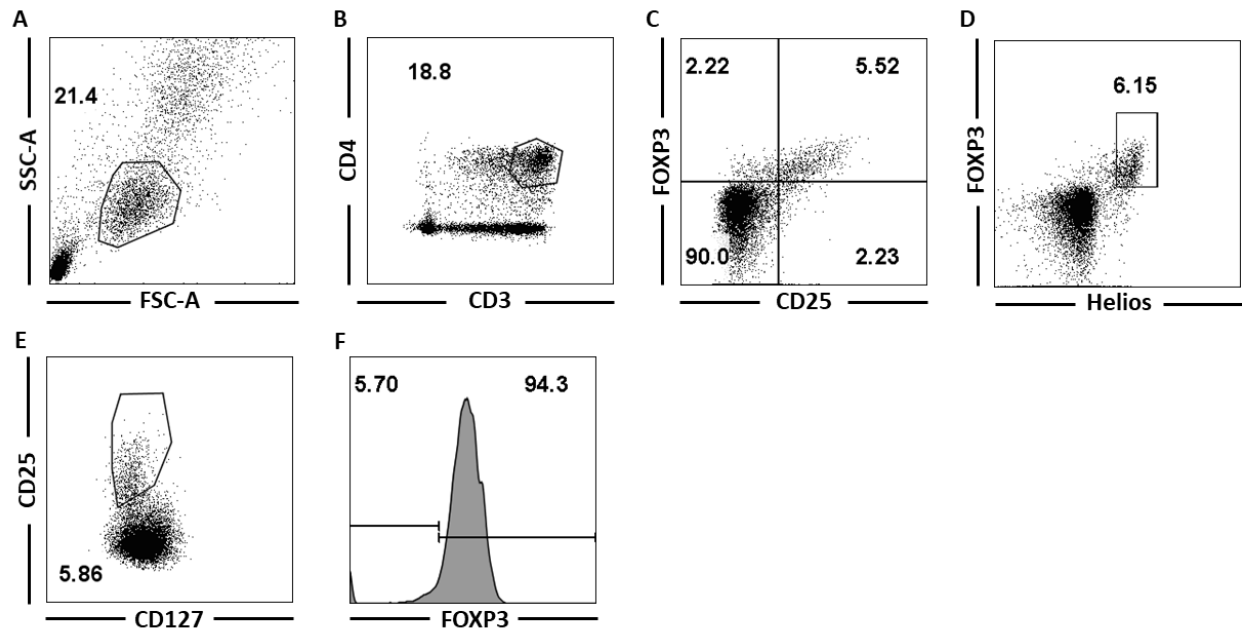

**Fig. S23, related to Fig. 6, A to C. Example gating used for T<sub>reg</sub> flow cytometry data.** The data corresponds with CD3<sup>+</sup>CD4<sup>+</sup> T cells shown in Fig. 6A. From left to right, gating first on (A) FSC-A and SSC-A, followed by gating on the CD4<sup>+</sup> T cell subset (B) CD3<sup>+</sup> and CD4<sup>+</sup>, followed by gating on the (C) CD25<sup>+</sup> and FOXP3<sup>+</sup> subset or the (D) Helios<sup>+</sup> and FOXP3<sup>+</sup> subset displayed in Fig. 6A and summarized by Fig. 6C. CD4<sup>+</sup> T cells were also gated on (E) CD127<sup>-/lo</sup> and CD25<sup>+</sup> expression, followed by (F) FOXP3<sup>+</sup> expression and summarized in Fig. 6B.

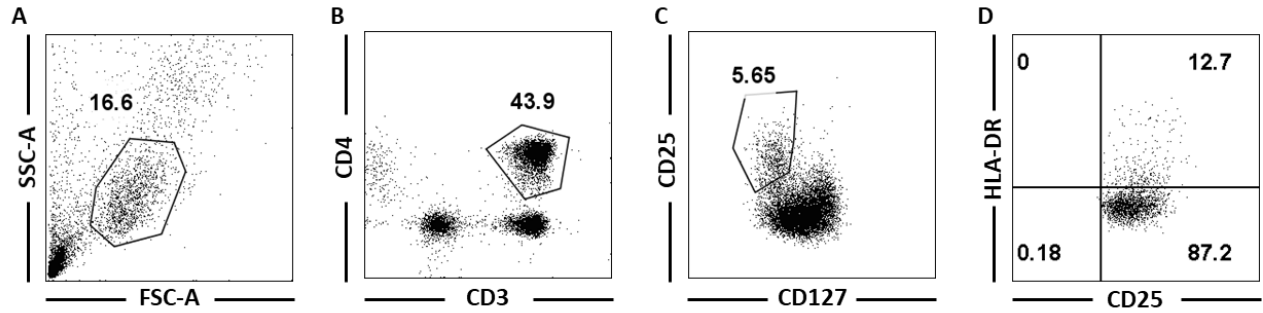

**Fig. S24, related to Fig. 6, D and E. Example gating used for T<sub>reg</sub> flow cytometry data.** The data corresponds with CD3<sup>+</sup>CD4<sup>+</sup>CD25<sup>+</sup>CD127<sup>-/lo</sup> T cells shown in Fig. 6D. From left to right, gating first on (A) FSC-A and SSC-A, followed by gating on the CD4<sup>+</sup> T cell subset (B) CD3<sup>+</sup> and CD4<sup>+</sup>, followed by gating on the (C) CD127<sup>-/lo</sup> and CD25<sup>+</sup> subset, followed by gating on the (D) HLA-DR<sup>+</sup> subset thus displayed as seen in Fig. 6D and summarized by Fig. 6E.

**Table S1. AIRE mutations and deletions detected in the American APECED patient cohort.**

| Patient Code | Age in years at Sampling | Gender | Race / Ethnicity     | Allele 1                                                                        |                  | Allele 2       |                  | Classic Triad |                    |                       | Other Clinical Manifestations                                 |
|--------------|--------------------------|--------|----------------------|---------------------------------------------------------------------------------|------------------|----------------|------------------|---------------|--------------------|-----------------------|---------------------------------------------------------------|
|              |                          |        |                      | DNA sequence                                                                    | Protein sequence | DNA sequence   | Protein sequence | CMC           | Hypoparathyroidism | Adrenal Insufficiency |                                                               |
| AIRE01       | 2.75                     | F      | White / Non-Hispanic | c.967_979del13                                                                  | p.L232SfsX51     | c.967_979del13 | p.L232SfsX51     | Yes           | Yes                | Yes                   | EH, KC, ID, Pneumonitis, SS, Urticaria, Vitiligo              |
| AIRE02       | 12                       | M      | White / Hispanic     | c.1235delC                                                                      | p.S412fsX373     | c.1235delC     | p.S412fsX373     | Yes           | No                 | Yes                   | ID, AIH                                                       |
| AIRE05       | 7                        | F      | White / Non-Hispanic | c.967_979del13                                                                  | p.L232SfsX51     | c.769C>T       | p.R257X          | No            | Yes                | Yes                   | Alopecia, EH, ID, ND, Urticaria                               |
| AIRE07       | 8                        | F      | White / Non-Hispanic | c.967_979del13                                                                  | p.L232SfsX51     | c.769C>T       | p.R257X          | Yes           | Yes                | No                    | EH, KC, ID, Urticaria                                         |
| AIRE08       | 18                       | F      | White / Hispanic     | c.1094_1106del                                                                  | p.L323fxX373     | c.47C>T        | p.T16M           | Yes           | Yes                | Yes                   | AIH, EH, HT, ID, KC, ND, Pneumonitis, Urticaria               |
| AIRE09       | 13                       | M      | White / Non-Hispanic | c.967_979del13                                                                  | p.L232SfsX51     | c.967_979del13 | p.L232SfsX51     | Yes           | Yes                | Yes                   | EH, Urticaria                                                 |
| AIRE10       | 17                       | F      | White / Non-Hispanic | c.967_979del13                                                                  | p.L232SfsX51     | c.967_979del13 | p.L232SfsX51     | Yes           | Yes                | Yes                   | Alopecia, EH, HT, KC, ND, OF, Urticaria, Vitiligo             |
| AIRE11       | 17                       | F      | White / Non-Hispanic | c.967_979del13                                                                  | p.L232SfsX51     | c.967_979del13 | p.L232SfsX51     | Yes           | Yes                | Yes                   | AIH, EH, Gastritis, HTN, ID, Pneumonitis, Urticaria, Vitiligo |
| AIRE13       | 10                       | F      | White / Non-Hispanic | c.967_979del13                                                                  | p.L232SfsX51     | c.131A>C       | p.Q44P           | No            | Yes                | No                    | EH, HT, ID, Urticaria, Vitiligo                               |
| AIRE14       | 17                       | F      | White / Non-Hispanic | c.967_979del13                                                                  | p.L232SfsX51     | c.769C>T       | p.R257X          | Yes           | Yes                | Yes                   | Gastritis, ID, Urticaria, Vitiligo                            |
| AIRE15       | 16                       | M      | White / Non-Hispanic | c.242T>C                                                                        | p.L81P           | c.1265delC     | p.P422fs         | No            | Yes                | Yes                   | Alopecia, DM, EH, UE                                          |
| AIRE16       | 20                       | M      | White / Non-Hispanic | Homozygous 1735 base deletion spanning c.133-126_c.539-180del (spans exons 2-4) |                  |                |                  | No            | Yes                | Yes                   | ID, ND, UE, Vitiligo                                          |
| AIRE17       | 18                       | F      | White / Non-Hispanic | c.463+2T>C                                                                      | p.P166L          | c.463+2T>C     | p.P166L          | Yes           | Yes                | No                    | EH, ID, UE, Vitiligo                                          |
| AIRE18       | 14                       | M      | White / Non-Hispanic | c.463+2T>C                                                                      | p.P166L          | c.463+2T>C     | p.P166L          | Yes           | Yes                | No                    | EH, ID                                                        |
| AIRE19       | 10                       | M      | White/Asian          | c.769C>T                                                                        | p.R257X          | c.1364G>A      | p.Trp455X        | Yes           | Yes                | No                    | EH, ID, KC, UE, Vitiligo                                      |

Abbreviations: Autoimmune Hepatitis (AIH), Diabetes Mellitus (DM), Enamel Hypoplasia (EH), Hypertension (HTN), Hypothyroidism (HT), Intestinal Dysfunction (ID), Keratitis/Conjunctivitis (KC), Nail Dystrophy (ND), Ovarian Failure (OF), Testicular Failure (TF), Sjogren's-like Syndrome (SS).

**Table S3. List of AIRE-dependent and AIRE-independent PTAs detected in protein microarray that were bound by recombinant antibodies cloned from new emigrant/transitional and mature naïve cells from HDs, AIRE<sup>+/-</sup> heterozygous individuals, and AIRE- and CD3-deficient patients.**

| Peripheral Tissue Antigen                | AIRE-dependence | Ensembl ID          | Gene Symbol | Aire_pos_TEC (mean counts) | Aire_ko_TEC (mean counts) | Fold Change | FDR (BH)    |
|------------------------------------------|-----------------|---------------------|-------------|----------------------------|---------------------------|-------------|-------------|
| Actin                                    | Yes             | ENSMUSG000000031972 | Acta1       | 187.9814784                | 86.71765399               | 0.461309565 | 0.048402107 |
|                                          | Yes             | ENSMUSG000000035783 | Acta2       | 1188.281402                | 379.1136564               | 0.319043667 | 1.14349E-27 |
|                                          | Yes             | ENSMUSG000000068614 | Actc1       | 292.0929595                | 15.12056631               | 0.051766281 | 5.35302E-13 |
| Bone Morphogenetic Protein 4 (BMP4)      | Yes             | ENSMUSG000000021835 | Bmp4        | 18.22565671                | 4.854039843               | 0.266330038 | 0.008217402 |
| Collagen type VIII                       | Yes             | ENSMUSG00000001506  | Col1a1      | 3249.15691                 | 104.3232101               | 0.032107778 | 1.93654E-34 |
|                                          | Yes             | ENSMUSG000000029661 | Col1a2      | 548.866171                 | 208.0686501               | 0.379088129 | 7.27543E-12 |
| Collagen type X                          | Yes             | ENSMUSG000000026043 | Col3a1      | 396.8858109                | 91.62966367               | 0.230871604 | 1.18745E-07 |
| IFN $\alpha$ 2                           | No              |                     |             |                            |                           |             |             |
| IFN $\omega$                             | No              |                     |             |                            |                           |             |             |
| IL-10                                    | No              |                     |             |                            |                           |             |             |
| IL-11                                    | No              |                     |             |                            |                           |             |             |
| IL-13                                    | No              |                     |             |                            |                           |             |             |
| IL-17A                                   | Yes             | ENSMUSG000000025929 | Il17a       | 18.70810882                | 0                         | 0           | 1.92493E-05 |
| IL-17B                                   | Yes             | ENSMUSG000000024578 | Il17b       | 293.577949                 | 1.849249858               | 0.006299008 | 1.44028E-34 |
| IL-17E                                   | No              |                     |             |                            |                           |             |             |
| IL-17F                                   | Yes             | ENSMUSG000000041872 | Il17f       | 14.40367303                | 0.616416619               | 0.042795794 | 9.06349E-05 |
| IL-20                                    | No              |                     |             |                            |                           |             |             |
| IL-21                                    | Yes             | ENSMUSG000000027718 | Il21        | 82.45489795                | 11.48003643               | 0.139228072 | 9.39143E-09 |
| IL-28A                                   | No              |                     |             |                            |                           |             |             |
| Insulin                                  | Yes             | ENSMUSG000000035804 | Ins1        | 10.58168935                | 0                         | 0           | 0.042407533 |
|                                          | Yes             | ENSMUSG000000000215 | Ins2        | 472.2060745                | 0                         | 0           | 1.68588E-35 |
| Kallikrein related peptidase 5 (KLK5)    | Yes             | ENSMUSG000000074155 | Klk5        | 689.5042318                | 54.03017816               | 0.078360909 | 2.8511E-28  |
| Macrophage-derived chemokine (MDC/CCL22) | Yes             | ENSMUSG000000031779 | Ccl22       | 8146.868785                | 2049.253109               | 0.25153874  | 4.80437E-51 |
| Matrix metalloproteinase 3 (MMP-3)       | Yes             | ENSMUSG000000043613 | Mmp3        | 83.48431619                | 0.597093341               | 0.007152162 | 8.38834E-22 |
| Threonyl-tRNA synthetase (PL-7)          | No              |                     |             |                            |                           |             |             |
| Thyroid peroxidase (TPO)                 | Yes             | ENSMUSG000000020673 | Tpo         | 108.8553596                | 0.616416619               | 0.005662713 | 9.44125E-26 |
| TWEAK/TNFSF12                            | No              |                     |             |                            |                           |             |             |

**Table S4. Dissociation constants of recombinant antibodies cloned from new emigrant/transitional and mature naïve cells from HDs, AIRE<sup>+/-</sup> heterozygous individuals, and AIRE- and CD3-deficient patients.**

| Antigen affinity (K <sub>D</sub> ): New emigrant/transitional B cells |       |         |        |        |            |           |         |       |       |
|-----------------------------------------------------------------------|-------|---------|--------|--------|------------|-----------|---------|-------|-------|
| Subject                                                               | Clone | Insulin | IL-17A | IL-17F | Fibrinogen | MDC/CCL22 | TWEAK   | IFN-α | IFN-ω |
| neHD10                                                                | L107  | -       | >10μM  | -      | -          | -         | -       | -     | -     |
| neHD28                                                                | K11   | 1-10μM  | -      | -      | -          | -         | -       | -     | -     |
| neHD28                                                                | K26   | -       | -      | -      | -          | >100μM    | -       | -     | -     |
| neAIRE <sup>+/-</sup> 05M                                             | K15   | >10μM   | -      | -      | -          | -         | -       | -     | -     |
| neAIRE-def.01                                                         | K52   | -       | -      | >100μM | -          | -         | -       | -     | -     |
| neAIRE-def.01                                                         | K61   | >100μM  | >10μM  | -      | -          | -         | -       | -     | -     |
| neAIRE-def.01                                                         | L72   | -       | -      | >100μM | -          | -         | -       | -     | -     |
| neCD3E-def.                                                           | K14   | -       | -      | -      | -          | -         | 1-10 μM | -     | -     |

| Antigen affinity (K <sub>D</sub> ): Mature naïve B cells |       |         |         |        |            |           |         |         |       |
|----------------------------------------------------------|-------|---------|---------|--------|------------|-----------|---------|---------|-------|
| Subject                                                  | Clone | Insulin | IL-17A  | IL-17F | Fibrinogen | MDC/CCL22 | TWEAK   | IFN-α   | IFN-ω |
| mnHD09                                                   | K06   | -       | 1-10μM  | -      | -          | -         | -       | -       | -     |
| mnHD10                                                   | L02   | -       | >10μM   | -      | -          | -         | -       | -       | -     |
| mnHD28                                                   | K11   | -       | -       | >100μM | -          | -         | -       | -       | -     |
| mnAIRE <sup>+/-</sup> 05M                                | K70   | -       | -       | -      | -          | -         | <1μM    | -       | -     |
| mnAIRE <sup>+/-</sup> 05M                                | K85   | -       | -       | -      | 1-10μM     | -         | -       | -       | -     |
| mnAIRE-def.01                                            | K15   | -       | -       | >100μM | -          | -         | -       | -       | -     |
| mnAIRE-def.01                                            | K45   | -       | -       | -      | -          | -         | >10μM   | -       | -     |
| mnAIRE-def.01                                            | K47   | >10μM   | >10μM   | -      | -          | -         | -       | -       | -     |
| mnAIRE-def.01                                            | L19   | 1-10 μM | -       | -      | -          | -         | <1nM    | 1-10 μM | <1μM  |
| mnAIRE-def.02                                            | K62   | -       | -       | -      | -          | -         | 1-10 μM | -       | -     |
| mnAIRE-def.02                                            | K84   | 1-10μM  | -       | -      | -          | -         | -       | -       | -     |
| mnAIRE-def.05                                            | L134  | >10μM   | -       | -      | -          | -         | -       | -       | -     |
| mnAIRE-def.07                                            | K81   | -       | 0.389μM | -      | -          | -         | -       | -       | -     |
| mnCD3D-def.                                              | K87   | -       | -       | -      | -          | -         | 1-10nM  | -       | -     |
| mnCD3D-def.                                              | L62   | -       | -       | -      | -          | -         | <1nM    | -       | -     |
| mnCD3E-def.                                              | K92   | -       | -       | -      | -          | -         | <1nM    | -       | -     |

**Table S5. List of protein microarray antigens.**

|    | <b>Analyte</b> | <b>Manufacturer, Product #</b> |
|----|----------------|--------------------------------|
| 1  | APRIL          | Peprtech, 310-10C              |
| 2  | BAFF           | Peprtech, 310-13               |
| 3  | BDNF           | Peprtech, 450-02               |
| 4  | EGF            | Peprtech, AF-100-15            |
| 5  | EPO            | Peprtech, 100-64               |
| 6  | GCSF           | Peprtech, 300-23               |
| 7  | GM-CSF         | Peprtech, 300-03               |
| 8  | HGF            | Peprtech, 100-39H              |
| 9  | HGH            | Peprtech, 100-40               |
| 10 | IFN-beta       | Peprtech, 300-02BC             |
| 11 | IFN-gamma      | Peprtech, 300-02               |
| 12 | IFN-imega      | Peprtech, 300-02J              |
| 13 | IL-10          | Peprtech, 200-10               |
| 14 | IL-11          | Peprtech, 200-11               |
| 15 | IL-12p40       | Peprtech, 200-12P40            |
| 16 | IL-12p70       | Peprtech, 200-12               |
| 17 | IL-13          | Peprtech, 200-13               |
| 18 | IL-15          | Peprtech, 200-15               |
| 19 | IL-16          | Peprtech, 200-16               |
| 20 | IL-17A         | Peprtech, 200-17               |
| 21 | IL-17B         | Peprtech, 200-28               |
| 22 | IL-17D         | Peprtech, 200-27               |
| 23 | IL-17E         | Peprtech, 200-24               |
| 24 | IL-17F         | Peprtech, 200-25               |
| 25 | IL-1b          | Peprtech, 200-01B              |
| 26 | IL-2           | Peprtech, 200-02               |
| 27 | IL-20          | Peprtech, 200-20               |
| 28 | IL-21          | Peprtech, 200-21               |
| 29 | IL-22          | Peprtech, 200-22               |
| 30 | IL-23          | Peprtech, 200-23               |
| 31 | IL-27          | Peprtech, 200-38               |
| 32 | IL-3           | Peprtech, 200-03               |
| 33 | IL-4           | Peprtech, 200-04               |
| 34 | IL-5           | Peprtech, 200-05               |
| 35 | IL-6           | Peprtech, 200-06               |
| 36 | IL-7           | Peprtech, 200-07               |
| 37 | IL-8           | Peprtech, 200-08M              |



|    |                    |                     |
|----|--------------------|---------------------|
| 38 | IL-9               | Peprotech, 200-09   |
| 39 | M-CSF              | Peprotech, 300-25   |
| 40 | CCL2 (MCP1)        | Peprotech, 300-04   |
| 41 | NOG                | Peprotech, 120-10C  |
| 42 | OSM                | Peprotech, 300-10   |
| 43 | SCF                | Peprotech, 300-07   |
| 44 | TGFB1              | Peprotech, 100-21   |
| 45 | TGFB2              | Peprotech, 100-35B  |
| 46 | TGFB3              | Peprotech, 100-36E  |
| 47 | TNF-beta           | Peprotech, 300-01B  |
| 48 | TNF-alpha          | Peprotech, 300-01A  |
| 49 | TPO                | Peprotech, 300-18   |
| 50 | TSLP               | Peprotech, 300-62   |
| 51 | VEGF 121           | Peprotech, 100-20A  |
| 52 | VEGF 165           | Peprotech, 100-20   |
| 53 | sCD40 Ligand/TRAP  | Peprotech, 310-02   |
| 54 | IL-29 (IFN-L1)     | Peprotech, 300-02L  |
| 55 | IL-28A (IFN-L2)    | Peprotech,300-02K   |
| 56 | CCL1               | Peprotech, 300-37   |
| 57 | CCL24 (Eotaxin-2)  | Peprotech, 300-33   |
| 58 | CXCL16             | Peprotech, 300-55   |
| 59 | CXCL13 (BCA-1/BLC) | Peprotech, 300-47   |
| 60 | CCL3               | Peprotech, 300-08   |
| 61 | CCL5               | Peprotech, 300-06   |
| 62 | SPARC              | Peprotech, 120-36   |
| 63 | TARC               | Peprotech, 300-30   |
| 64 | ANG2               | Peprotech, 130-07   |
| 65 | EGFR               | Peprotech, 100-15R  |
| 66 | MDC                | Peprotech, 300-36A  |
| 67 | MIP3               | Peprotech, 300-29   |
| 68 | MIF                | Peprotech, 300-69   |
| 69 | MMP-3              | Peprotech, 420-03   |
| 70 | TWEAK              | Peprotech, 310-06   |
| 71 | BMP4               | Peprotech, 120-05   |
| 72 | IL-17A             | R&D, 317-ILB-050    |
| 73 | CXCL4              | R&D, 795-P4-025/CF  |
| 74 | IL-18              | R&D, 9124-IL-050/CF |
| 75 | IL-26 monomer      | R&D, 1375-IL-025/C  |
| 76 | PDGFR-A            | R&D, 322-PR-050/CF  |

|     |                                 |                        |
|-----|---------------------------------|------------------------|
| 77  | CX3CL1                          | R&D, 365-FR-025/CF     |
| 78  | HMGB1                           | R&D, 1690-HMB-050      |
| 79  | CTGF                            | R&D, 9190-CC-050       |
| 80  | TGFB RIII                       | R&D, 242-R3-100/CF     |
| 81  | TNC                             | R&D, 3358-TC-050       |
| 82  | sTNF RI/TNFRSF1A                | R&D, 636-R1-025/CF     |
| 83  | IFN-alpha2a                     | Prospec, CYT-204       |
| 84  | TNF RII                         | Prospec, CYT-769       |
| 85  | VEGF                            | Prospec, CYT-260       |
| 86  | VEGFR2                          | Prospec, PKA-242       |
| 87  | MMP-7                           | Prospec, ENZ-867       |
| 88  | ISG15                           | Prospec, PRO-611       |
| 89  | Fibrinogen 1                    | Prospec, PRO-2210      |
| 90  | NPM1 (B23)                      | Prospec, PRO-1120      |
| 91  | RPP30                           | Prospec, ENZ-040       |
| 92  | FBL                             | Prospec, ENZ-566       |
| 93  | KLK5                            | Prospec, ENZ-630       |
| 94  | SAE1                            | Prospec, ENZ-534       |
| 95  | DSG1                            | Abnova, H00001828-P01  |
| 96  | DSG4                            | Abnova, H00147409-Q01  |
| 97  | U1-snRNP 68                     | Diarect, A13001        |
| 98  | U1-snRNP A                      | Diarect, A13101        |
| 99  | U1-snRNP C                      | Diarect, A13201        |
| 100 | La/SSB                          | Diarect, A12801        |
| 101 | Ro 60/SS-A (bovine)             | Diarect, A15501        |
| 102 | Ro 60/SS-A (recombinant)        | Diarect, A17401        |
| 103 | Ro 52/SSA                       | Diarect, A12701        |
| 104 | genomic double-stranded DNA     | Sigma, D1626           |
| 105 | plasmid double-stranded DNA     | Diarect, A12301        |
| 106 | Sm/RNP (SRC-3000)               | Immunovision, SRC-3000 |
| 107 | Smith (SMA-3000)                | Immunovision, SMA-3000 |
| 108 | U-snRNP B/B'                    | Diarect, A13301        |
| 109 | Histone H1 (His-1001)           | Immunovision, HIS-1001 |
| 110 | Histone H2a & H4 (His-1002)     | Immunovision, HIS-1002 |
| 111 | Histone H2b (His-1003)          | Immunovision, HIS-1003 |
| 112 | Histone H3 (His-1004)           | Immunovision, HIS-1004 |
| 113 | Whole Histone (His-1000)        | Immunovision, HIS-1000 |
| 114 | Jo-1 (Histidyl-tRNA synthetase) | Diarect, A12901        |
| 115 | Ku, p70/p80                     | Diarect, A17301        |

|     |                             |                           |
|-----|-----------------------------|---------------------------|
| 116 | PCNA                        | Diarect, A15401           |
| 117 | Ribosomal phosphoprotein P0 | Diarect, A14101           |
| 118 | Ribosomal phosphoprotein P1 | Diarect, test lot 1193    |
| 119 | Ribosomal phosphoprotein P2 | Diarect, test lot 1179    |
| 120 | CENP B                      | Diarect, A12501           |
| 121 | CENP A                      | Diarect, A16901           |
| 122 | PM/Scl 100                  | Diarect, A16001           |
| 123 | PL-7                        | Diarect, A15601           |
| 124 | PL-12                       | Diarect, A15701           |
| 125 | Elastase                    | Arotec, ATE01             |
| 126 | Azurocidin                  | The Binding Site, BH236.X |
| 127 | BPI                         | Arotec, ATB01-02          |
| 128 | Mi-2                        | Diarect, A18101           |
| 129 | TG                          | Diarect, A12201           |
| 130 | TPO                         | Diarect, A12101           |
| 131 | LC1                         | Diarect, A13701           |
| 132 | LKM1                        | Diarect, A13501           |
| 133 | b2GP I                      | Diarect, A14901           |
| 134 | Actin                       | Molecular Probes, A12375  |
| 135 | Scl-70, truncated           | Diarect, A14501           |
| 136 | GBM, undissociated          | Diarect, A15901           |
| 137 | GBM, dissociated            | Diarect, A16801           |
| 138 | Hsp70                       | Stressgen, NSP-555        |
| 139 | Hsp90                       | Stressgen, SPP-770        |
| 140 | Grp78                       | Stressgen, SPP-765        |
| 141 | Hsp47                       | Stressgen, NSP-535        |
| 142 | Hsp25                       | Stressgen, NSP-510        |
| 143 | Hsp60                       | Stressgen, NSP-540        |
| 144 | Scl-70, full-length         | Diarect, A12401           |
| 145 | MMP-9                       | Arotec, ATM03-02          |
| 146 | NGAL                        | Arotec, ATN01-02          |
| 147 | Intrinsic Factor            | Diarect, A16701           |
| 148 | Tissue Transglutaminase     | Diarect, A15200           |
| 149 | PM/Scl 75                   | Diarect, test lot 1137/2  |
| 150 | Annexin V                   | Sigma, A9460              |
| 151 | MPO                         | Diarect, 18501            |
| 152 | PR3                         | Diarect, 18601            |
| 153 | SRP54                       | Diarect, A18401           |
| 154 | C1q                         | Biodesign, A90150H        |

|     |                              |                                |
|-----|------------------------------|--------------------------------|
| 155 | LAMP-2                       | Diarect, test lot 99B06        |
| 156 | M2 Antigen                   | Diarect, A18001                |
| 157 | BCOADC-E2                    | Diarect, test lot 1201/2       |
| 158 | PDC-E2                       | Diarect, test lot 359/1        |
| 159 | gp210                        | Diarect, A19001                |
| 160 | Sp 100                       | Diarect, A18901                |
| 161 | Annexin V                    | Diarect, 19101                 |
| 162 | BPI                          | Diarect, Test lot 1352         |
| 163 | Nup62                        | Diarect, 19401                 |
| 164 | SmD1                         | Diarect, 11801                 |
| 165 | SmD2                         | Diarect, 11901                 |
| 166 | SmD3                         | Diarect, 12001                 |
| 167 | SmD                          | Diarect, 11701                 |
| 168 | MDA5                         | Diarect, 30001                 |
| 169 | B2-Glycoprotein I            | Surmodics, A14900              |
| 170 | b2GP I non-recom. Human      | Surmodics, A11300              |
| 171 | b2GP I non-recom. Bovine     | Surmodics, A11401              |
| 172 | Gliadin                      | Diarect, 19501                 |
| 173 | GP2                          | Diarect, 19601                 |
| 174 | EJ (Glycycl-tRNA synthetase) | Diarect, 11101                 |
| 175 | TIF1-gamma                   | Diarect, 11001                 |
| 176 | Nucleolin                    | Diarect, 19701                 |
| 177 | Parietal cell antigen        | Arotec, ATP01-04               |
| 178 | Cardiolipin                  | Sigma, C1649                   |
| 179 | Cardiolipin                  | Sigma, C0563                   |
| 180 | Aggrecan                     | Sigma, A1960                   |
| 181 | Aggrecan                     | Biologend                      |
| 182 | Fibrinogen type I-S          | Sigma, F8630                   |
| 183 | Fibrinogen type IV           | Sigma, F4753                   |
| 184 | Fibrinogen type I            | Sigma, F3879                   |
| 185 | Laminin                      | Sigma, L2020                   |
| 186 | single-stranded DNA          | Sigma, D8661                   |
| 187 | Aldolase, type X             | Sigma, A2714                   |
| 188 | Vimentin                     | Sigma, V4383                   |
| 189 | Bare bead 1                  |                                |
| 190 | Myosin                       | Sigma, M1636                   |
| 191 | Collagen type IV             | Sigma, C5533                   |
| 192 | Collagen type VI             | Sigma, C7521                   |
| 193 | Human HDL                    | Academy Bio-medical, 80P-HD101 |

|     |                             |                                  |
|-----|-----------------------------|----------------------------------|
| 194 | MDA-modified human LDL      | Academy Bio-medical, 20P-MD-L110 |
| 195 | PDH                         | Sigma, P7032                     |
| 196 | ECL-CAM                     | USBiological, E0275              |
| 197 | Insulin                     | Sigma, I0908                     |
| 198 | Lipoprotein lipase          | Sigma, L9656                     |
| 199 | Proteoglycans               | Sigma, P5864                     |
| 200 | EBV EA-D                    | Biodesign, R18740                |
| 201 | EBV EA                      | Prospec Bio, EBV-272             |
| 202 | EBV EBNA-1                  | Prospec Bio, EBV-276             |
| 203 | EBV P18                     | Prospec Bio, EBV-273             |
| 204 | Collagen I                  | MBL, JM-4796-10                  |
| 205 | Collagen V                  | Abcam, ab7537                    |
| 206 | POLR3H                      | Fitzgerald 80R-2507              |
| 207 | Catalase                    | Sigma, C3556                     |
| 208 | Bare bead 2                 |                                  |
| 209 | XRCC4                       | Abnova, H00007518-P01            |
| 210 | LIG4                        | Abnova, H00003981-Q01            |
| 211 | XLF (NHEJ1)                 | Abnova, H00079840-P01            |
| 212 | Ku80 (XRCC5)                | Abnova, H00007520-P01            |
| 213 | DNA PKcs (PRKDC)            | Abnova, H00005591-Q01            |
| 214 | GSN                         | Abnova, H00002934-P01            |
| 215 | LTF                         | Abcam, ab90354                   |
| 216 | Lysozyme                    | Sigma, L8402                     |
| 217 | Cathepsin G                 | Enzo, BML-SE283-0100             |
| 218 | RPP25                       | TP303538 Origene 20ug            |
| 219 | RPP14                       | TP760291 Origene 50ug            |
| 220 | U11/U12 RNP                 | Origene, TP303746, 20ug          |
| 221 | MORC3                       | TP310530 Origene 20 ug           |
| 222 | PDGFR-B                     | BioVision, 7493-50, 1x50 ug      |
| 223 | Enolase                     | Sigma, E0379                     |
| 224 | Heparan sulfate             | Sigma, H7640                     |
| 225 | Oxidized human LDL          | Academy Bio-Medical, 20P-OX-L110 |
| 226 | Hepatitis B surface antigen | Meridian Life Sciences, R36100   |
| 227 | Collagen type II            | Sigma, C1188                     |
| 228 | Collagen type VIII          | Sigma, C7774                     |
| 229 | Collagen type IX            | Sigma, C3657                     |
| 230 | Collagen type X             | Sigma, C4407                     |

|     |                                                                          |                           |
|-----|--------------------------------------------------------------------------|---------------------------|
| 231 | a-actinin                                                                | Sigma, A9776              |
| 232 | ssDNA 30ug                                                               | Sigma, D8899              |
| 233 | ssDNA 15ug                                                               | Sigma, D8899              |
| 234 | ssDNA 5ug                                                                | Sigma, D8899              |
| 235 | GST 10ug                                                                 | Sigma, G8642              |
| 236 | Bare bead 3                                                              |                           |
| 237 | Fibrinogen 10ug                                                          | Sigma, F3879              |
| 238 | Myosin 10ug                                                              | Sigma, M7659              |
| 239 | ssDNA 30ug in MES                                                        | Sigma, D8899              |
| 240 | ssDNA 15ug in MES                                                        | Sigma, D8899              |
| 241 | ssDNA 5ug in MES                                                         | Sigma, D8899              |
| 242 | IgG from human serum D1                                                  | Sigma, I2511-10MG         |
| 243 | IgG from human serum D2                                                  |                           |
| 244 | IgG from human serum D3                                                  |                           |
| 245 | ChromPure Human IgG, Fc fragment D1                                      | Jackson, 009-000-008      |
| 246 | ChromPure Human IgG, Fc fragment D2                                      |                           |
| 247 | ChromPure Human IgG, Fc fragment D3                                      |                           |
| 248 | human IgE D1                                                             | Thermo Fisher, DIA HE1-01 |
| 249 | human IgE D2                                                             |                           |
| 250 | human IgE D3                                                             |                           |
| 251 | IgM from human serum D1                                                  | Sigma, I8260-1MG          |
| 252 | IgM from human serum D2                                                  |                           |
| 253 | IgM from human serum D3                                                  |                           |
| 254 | IgA from human colostrum D1                                              | Sigma, 2636-5MG           |
| 255 | IgA from human colostrum D2                                              |                           |
| 256 | IgA from human colostrum D3                                              |                           |
| 257 | AffiniPure Goat Anti-Human IgG, F(ab') <sub>2</sub> fragment specific D1 | Jackson, 109-005-097      |
| 258 | AffiniPure Goat Anti-Human IgG, F(ab') <sub>2</sub> fragment specific D2 |                           |
| 259 | AffiniPure Goat Anti-Human IgG, F(ab') <sub>2</sub> fragment specific D3 |                           |
| 260 | AffiniPure Fab Fragment Goat Anti-Human IgG (H+L) D1                     | Jackson, 109-007-003      |
| 261 | AffiniPure Fab Fragment Goat Anti-Human IgG (H+L) D2                     |                           |
| 262 | AffiniPure Fab Fragment Goat Anti-Human IgG (H+L) D3                     |                           |
| 263 | AffiniPure Rabbit Anti-Human IgG (H+L) D1                                | Jackson, 309-005-082      |
| 264 | AffiniPure Rabbit Anti-Human IgG (H+L) D2                                |                           |
| 265 | AffiniPure Rabbit Anti-Human IgG (H+L) D3                                |                           |
| 266 | AffiniPure Goat Anti-Human IgG, Fc $\gamma$ Fragment Specific D1         | Jackson, 109-005-098      |
| 267 | AffiniPure Goat Anti-Human IgG, Fc $\gamma$ Fragment Specific D2         |                           |
| 268 | AffiniPure Goat Anti-Human IgG, Fc $\gamma$ Fragment Specific D3         |                           |
| 269 | AffiniPure Rabbit Anti-Human IgG + IgM (H+L) D1                          | Jackson, 309-005-107      |

|     |                                                                |                           |
|-----|----------------------------------------------------------------|---------------------------|
| 270 | AffiniPure Rabbit Anti-Human IgG + IgM (H+L) D2                |                           |
| 271 | AffiniPure Rabbit Anti-Human IgG + IgM (H+L) D3                |                           |
| 272 | Goat Anti-Human IgM, Mouse/Bovine/Horse SP ads-UNLB D1         | Southern Biotech, 2023-01 |
| 273 | Goat Anti-Human IgM, Mouse/Bovine/Horse SP ads-UNLB D2         |                           |
| 274 | Goat Anti-Human IgM, Mouse/Bovine/Horse SP ads-UNLB D3         |                           |
| 275 | AffiniPure Goat Anti-Human IgM, Fc5 $\mu$ fragment specific D1 | Jackson, 109-005-129      |
| 276 | AffiniPure Goat Anti-Human IgM, Fc5 $\mu$ fragment specific D2 |                           |
| 277 | AffiniPure Goat Anti-Human IgM, Fc5 $\mu$ fragment specific D3 |                           |

## Materials and Methods

### Analysis of recombinant antibodies on the antigen arrays

6 µg of each antigen and a three-point dilution series of various control mouse and anti-mouse antibodies (0.25, 1, 4 µg) were diluted in PBS and transferred to 96-well plates. Diluted antigens and control antibodies were coupled to  $1 \times 10^6$  carboxylated magnetic beads per ID (MagPlex-C, Luminex Corp.). For this step, beads were distributed into 96-well plates (Greiner BioOne), washed and re-suspended in phosphate buffer (0.1M NaH<sub>2</sub>PO<sub>4</sub>, pH 6.2) using a plate washer (Biotek). Bead surface was activated by adding 100 µl of phosphate buffer containing 0.5 mg of 1-ethyl-3(3-dimethylamino-propyl)carbodiimide (Pierce) and 0.5 mg N-hydroxysuccinimide (Pierce). After 20 min incubation on a shaker (Grant Bio), beads were washed and re-suspended in activation buffer (0.05M MES, pH 5.0). Diluted antigens and control antibodies were incubated with beads for 2 hours at RT. The beads were washed 3 times in 100 µL PBS-T, re-suspended in 60 µL storage buffer (Blocking reagent for ELISA, Roche) and stored in plates at 4°C overnight.

Immobilization of the antigens and control antibodies on the correct bead IDs were confirmed by analysis of the following commercially available mouse monoclonal antibodies: anti-La/SSB (Santa Cruz), anti-Ro52 (Santa Cruz), anti-His6 tag (Invitrogen), anti-Scl70 and anti-SSB (Immunovision), anti-IL1, anti-IL2, anti-IL4, anti-IL5, anti-IL6, anti-IL10, anti-IL13, anti-IL17A, anti-CCL2, anti-IFN-β and anti-IFN-γ (eBiosciences), and anti-GM-CSF (Biolegend), all analyzed at 1 µg/mL (data not shown). In addition, dilution series (1:50 to 1:300) of various autoimmune disease state human plasma for ds-DNA, Scl-70, SSA, SSB, cardiolipin, whole histones and RNP (Immunovision), as well as normal human sera (Immunovision) were used to validate the content of the array (data not shown). Following this, two antibody pools (one for the mature naïve and one for new emigrant/transitional B cell fraction) were prepared for each of the nine donors (two HD, three AIRE<sup>+/-</sup> subjects and four AIRE-deficient patients). The 18 antibody pools



were analyzed with the bead array as a dilution series (1:62.5 to 1:1000) to choose the optimal sample dilution (data not shown).

Based on the optimized assay conditions, all individual antibody clones were diluted 1:65 in an assay buffer of 0.05% PBS-T supplemented with 3% (w/v) BSA (Sigma). The bead array was distributed into 384-well plates (Greiner BioOne) by transferring 5  $\mu$ L bead array per well and 45  $\mu$ L of the 1:65 diluted antibody clones were added into the 384-well plate. Samples were incubated for 90 min on a shaker (Grant Bio) at RT. The beads were washed with 3  $\times$  60  $\mu$ L PBS-T on a plate washer (EL406, Biotek), followed by addition of 50  $\mu$ L of R-PE conjugated AffiniPure F(ab')<sub>2</sub> fragment goat anti-human IgG, Fc $\gamma$  fragment specific (Jackson), diluted 1:500 in a buffer consisting of 3% BSA in 0.05% PBS-T. After incubation with the secondary antibody for 45 min, plates were washed with 3  $\times$  60  $\mu$ L PBS-T and re-suspended in 60  $\mu$ L PBS-T, then analyzed on a FlexMap3D instrument (Luminex Corp.). At least 100 events per bead ID were counted and binding events were displayed as median fluorescence intensity (MFI). Data were analyzed using R. Heatmaps were rendered using the pheatmap package following log<sub>2</sub>-transformation and scaling, where first a scaling factor matrix was built by calculating the median MFI vector over all antigens per sample, followed by dividing MFI values for each antigen by this scaling factor matrix.

### **Plasmon resonance analysis**

Binding studies were performed at 25°C using a Biacore T100 optical biosensor (GE HealthCare, Biacore, Piscataway, NJ). The antigens were immobilized on a CM5 research-grade sensor chip using amine coupling and IL-17A protein (R&D Systems cat. number: 7955-IL-025/CF) at 20  $\mu$ g/ml solution in 10 mM acetate buffer pH 4.5; IL-17F protein (PeproTech cat.number: 200-25) at 20  $\mu$ g/ml solution in 10 mM acetate buffer pH 4.5; Insulin

(MilliporeSigma cat.number: I2767) at 20 µg/ml solution in 10 mM acetate buffer pH 4.75, Bovine Serum Albumin (MilliporeSigma cat.number: A9647) at 20 µg/ml solution in 10 mM acetate buffer pH 4.5; TWEAK (PeproTech cat.number: 310-06-25) 20µg/ml in 10 mM acetate buffer pH 5.5, Fibrinogen (MilliporeSigma cat.number: F3879) 20µg/ml in 10 mM acetate buffer pH 4.0, Collagen (MilliporeSigma cat.number: C7774) 100µg/ml in 10 mM acetate buffer pH 4.0, IFN- $\omega$  (Fisher Scientific cat.number: BMS304) 10µg/ml in 10 mM acetate buffer pH 4.5, IFN- $\alpha$ 2 (BioLegend cat.number: 592704) 20µg/ml in 10 mM acetate buffer pH 4.5; MDC/CCL22 (PeproTech cat.number: 300-36A) at 20 µg/ml solution in 10 mM acetate buffer pH 5.5; KLK5 (R&D Systems cat. number: 1108-SE-010) at 13 µg/ml solution in 10 mM acetate buffer pH 5.0. High density chips were used that contained ~5-6 kRUs of IL-17A, 10.6 kRUs of IL-17F, 1.2-1.5 kRUs of Insulin, 7-9 kRUs of BSA., 10 kRUs for TWEAK, 10 kRUs for Fibrinogen, 6.8 kRUs for Collagen, 6.6 kRUs for IFN- $\omega$ , 2.1 kRUs for IFN- $\alpha$ 2, 6.0 kRUs of MDC/CCL22, 3.9 kRUs of KLK5. Antibodies were injected from three fold dilution series starting with either 3 or 1 µM stock using a single-cycle approach [64]. The surfaces were regenerated by 30 second injections of 3M MgCl<sub>2</sub>. The binding responses were double-referenced against the non-specific binding to dextran alone and injections of buffer alone. Binding affinity was determined by either fitting the amplitudes observed during the steady-state phase, or kinetics of the binding reaction, to a simple 1:1 binding model using BioEvaluation software (GE HealthCare, Biacore, Piscataway, NJ).
